# Supplementary material for: CBX5 loss drives EGFR inhibitor resistance and results in therapeutically actionable vulnerabilities in lung cancer
Source: PubMed Central journal article supplement — Proc Natl Acad Sci U S A. 2023 Jan 18;120(4):e2218118120. doi: 10.1073/pnas.2218118120 (PMC9942844; doi:10.1073/pnas.2218118120), 2023-01-18
Supplement: pnas.2218118120.sapp.pdf [file pnas.2218118120.sapp.pdf]

## Supporting Information for

### **CBX5 loss drives EGFR inhibitor resistance and results in therapeutically actionable vulnerabilities in lung cancer**

Suresh Bugide, Yvonne J. K. Edwards, Romi Gupta, Michael R. Green, and Narendra Wajapeyee

Correspondence to:

Narendra Wajapeyee, **Email:** [nwajapey@uab.edu](mailto:nwajapey@uab.edu)

Michael R. Green, **Email:** [Michael.Green@umassmed.edu](mailto:Michael.Green@umassmed.edu)

#### **This PDF file includes:**

- SI Materials and Methods
- Figures S1 to S12
- Tables S1 to S3
- Legends for Datasets S1 to S3
- SI References

#### **Other supporting materials for this manuscript include the following:**

- Datasets S1 to S3

## SI Materials and Methods

**MTT assays.** For MTT assays,  $5 \times 10^3$  LUAD cells were plated in triplicate in a volume of 100  $\mu$ l in 96-well plates. After 24 h, erlotinib was administered at various concentrations, as indicated in the figures and figure legends. After 5 days of treatment, cell viability was evaluated by adding 20  $\mu$ l of 5 mg/ml 3-(4,5-dimethylthiazol-2-yl)-2,5-diphenyltetrazolium bromide (MTT) solution, dissolved in 1X PBS, to each well of the 96-well plate and incubating for 1 h at 37°C. MTT solution was then gently removed, and 100  $\mu$ l of DMSO was added to each well. After mixing well by pipetting, absorbance was measured at 590 and 630 nm, using the BioTek Synergy MX Multi Format Microplate Reader (Winooski, VT, USA). The average measurement at 630 nm was subtracted from the average at 590 nm, and the relative growth rate was plotted with respect to vehicle control-treated cells. *P*-values were calculated using GraphPad Prism software.

**Immunoblot analysis.** Cells were lysed using Pierce IP Lysis Buffer (Thermo Fisher Scientific), containing Roche Complete Protease Inhibitor Cocktail (Roche, Basel, Switzerland) and Phosphatase Inhibitor Cocktail (Sigma-Aldrich). Cell lysates were centrifuged at 10,000 rpm for 10 min, and protein concentrations were estimated using the Bradford Assay (Bio-Rad, Hercules, CA, USA). Equal amounts of protein were subjected to sodium dodecyl sulfate-polyacrylamide gel electrophoresis (SDS-PAGE) and transferred to nitrocellulose members. These were blocked with 5% non-fat milk and incubated with primary antibodies at 4°C overnight. Membranes were then washed three times for 15 min each with 1X Tris-buffered saline plus Tween 20 (TBS-T) and incubated with a secondary antibody for 2 h at room temperature. Protein signals were detected using SuperSignal West Pico Chemiluminescent Substrate Kit (Thermo Fisher Scientific) or SuperSignal West Femto Chemiluminescent Substrate Kit. All antibodies and the dilutions used for this study are listed in **SI Appendix, Table S3**. Quantification of the western blot bands in Figure 1C was carried out by optical densitometry and analyzed using the ImageJ software. The expression of CBX5 protein analyzed was normalized with ACTINB. Normalized band intensity values were converted into fold changes and plotted as bar graphs.

**RNA isolation and qRT-PCR analysis.** Total RNA for mRNA expression analyses was extracted with TRIzol Reagent (Invitrogen, Thermo Fisher Scientific) and purified using RNeasy mini columns (QIAGEN, Hilden, Germany). Total mRNA was reverse transcribed into cDNA using the M-MuLV First-Strand cDNA Synthesis Kit (New England Biolabs, Ipswich, MA, USA), according to the manufacturer's instructions, and qPCR reactions were performed using the Power SYBR® Green Kit (Applied Biosystems, Thermo Fisher Scientific), according to the manufacturer's instructions. Expression data were normalized to *ACTINB* expression as an internal control. Primer sequences used in this study are listed in **SI Appendix, Table S3**.

**CUT&RUN assays.** CUT&RUN assays were performed in HCC827 or PC9 cells using the CUT&RUN Assay Kit (Cat #86652; Cell Signaling Technology, Danvers, MA, USA), according to the manufacturer's instructions. Briefly,  $2 \times 10^5$  cells were harvested, washed, bound to activated Concanavalin A-coated Beads, and permeabilized. Bead–cell complexes were incubated with the respective antibody overnight at 4°C. Cells were then washed three times, resuspended in 100  $\mu$ l pAG/MNase (Protein A and Protein G fused to micrococcal nuclease), and incubated for 1 h at room temperature. Samples were washed three times with Digitonin Buffer plus Protease Inhibitor Cocktail, resuspended in 150  $\mu$ l Digitonin Buffer, and incubated for 5 min on ice. MNase was activated by adding calcium chloride, and samples were incubated at 4°C for 30 min. The reaction was stopped by adding 150  $\mu$ l of 1X Stop Buffer, and samples were incubated at 37°C for 10 min to release the DNA fragments. The DNA was extracted using the included DNA Purification Spin Columns, and qPCR was performed with *E2F1* or *BIRC5* promoter-specific primers. Relative fold-change was calculated as the ratio of immunoprecipitated DNA to IgG-precipitated DNA. Primer sequences and antibodies used for CUT&RUN assays are listed in **SI Appendix, Table S3**.

**RNA-seq.** RNA-seq was performed for nine samples representing three biological replicates of the following three groups: *CBX5* shRNA1 (G7), *CBX5* shRNA1 (G1), and NS shRNA. Single-end 76-bp reads were sequenced using the Illumina HiSeq 2500 sequencing instrument. Pre-alignment

quality assessments of the raw fastq sequences were performed using FastQC, v0.11.9. The number of reads for the nine samples ranged from 20 M to 34 M. The raw fastq sequences were aligned to the human hg38 reference genome (GenBank assembly accession: GCA\_000001405.28), and alignments were performed using STAR, v2.7.1a (1), with default parameters. Post-alignment quality assessments were performed with RSeQC, v2.6.3 (2), and MultiQC, v1.4 (3). SAMtools, v0.0.19 (4), and IGV, v2.6.2 (5) were used for indexing and viewing the alignments, respectively. Gene expression was quantified at the gene level using the htseq-count function in HTSeq, v.0.12.3, with default parameters, and the University of California, Santa Cruz (UCSC) gene annotations for the human genome (Hg38). Genes for which there were less than three samples with normalized counts greater than or equal to four were filtered out. Differentially expressed genes (DEGs) were identified using DESeq2, v1.28 (6), with default parameters (Love et al 2014). Genes were considered differentially expressed if  $P_{adj}$ -value  $< 0.05$  and absolute  $\log_2$  fold-change  $> 1$ . Normalized gene expression data were used for all downstream analyses. Venn diagrams were generated using InteractiVenn (7), and heatmaps were generated with the ComplexHeatmap package, v.1.12.0 in Bioconductor. The volcano plot was produced with the R Bioconductor package EnhancedVolcano, and DEGs were analyzed by the Ingenuity Pathway Analysis (IPA) tool (QIAGEN). RNA-sequencing data have been deposited in NCBI's Gene Expression Omnibus (GEO accession number GSE114563).

**Annexin V assays.** The binding of annexin V to cells was measured using the PE-Annexin V Apoptosis Detection Kit I (Cat #559763; Pharmingen™, BD Biosciences, Franklin Lakes, NJ, USA), according to the manufacturer's protocol. In brief, PC9 and HCC827 cells expressing either an NS or *CBX5* shRNA, or PC9 *BIRC5/CBX5* double-knockdown cells, were treated with 50 nM erlotinib for 24 h or HCC827-R1, HCC827-R2, HCC2935-R1, HCC2935-R2 (20 nM), PC9-R1 and PC9-R2 (50 nM) treated with *BIRC5* inhibitor YM155. Post-treatment, cells were collected, washed two times with 1X PBS, and resuspended in 1x Binding Buffer. Cells were then stained with 5  $\mu$ l PE-Annexin V and 5  $\mu$ l 7-amino-actinomycin D (7-AAD) and incubated for 15 min in the dark. Flow cytometry analysis was performed using a BD LSRFortessa Flow Cytometer (BD Biosciences, San Jose, CA, USA), and data were analyzed using FlowJo software (Ashland, OR, USA).

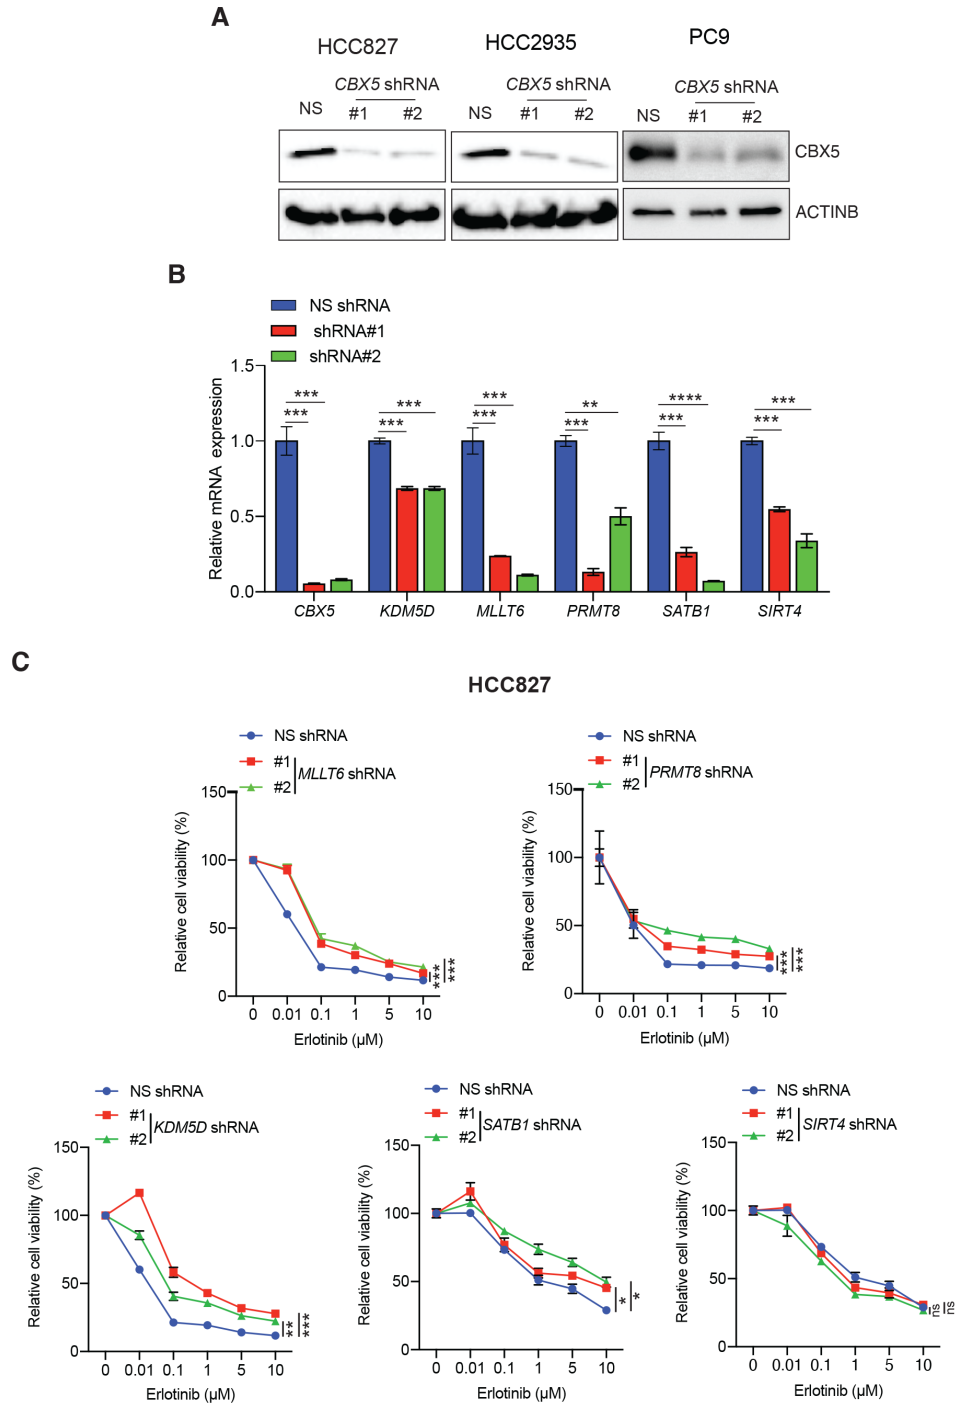

**Fig. S1.** Identification of epigenetic regulators of EGFRi resistance. (A) Immunoblot analysis measuring CBX5 levels in the indicated LUAD cell lines. ACTINB was used as a loading control. (B) Expression of the indicated genes in HCC827 cells expressing shRNAs targeting those genes analyzed by qRT-PCR; mRNA expression of indicated genes in knockdown cells relative to expression in NS shRNA-expressing cells is plotted. Data were normalized to *ACTINB*. (C) Relative survival (%) of HCC827 cells expressing an NS shRNA or shRNA targeting the indicated gene treated for 5 days with the indicated concentrations of erlotinib or dimethyl sulfoxide (DMSO) (0), as measured by MTT assay. Data are presented as the mean  $\pm$ SEM. ns = not significant; \*  $P < 0.05$ , \*\*  $P < 0.01$ , \*\*\*  $P < 0.001$ , and \*\*\*\*  $P < 0.0001$ .

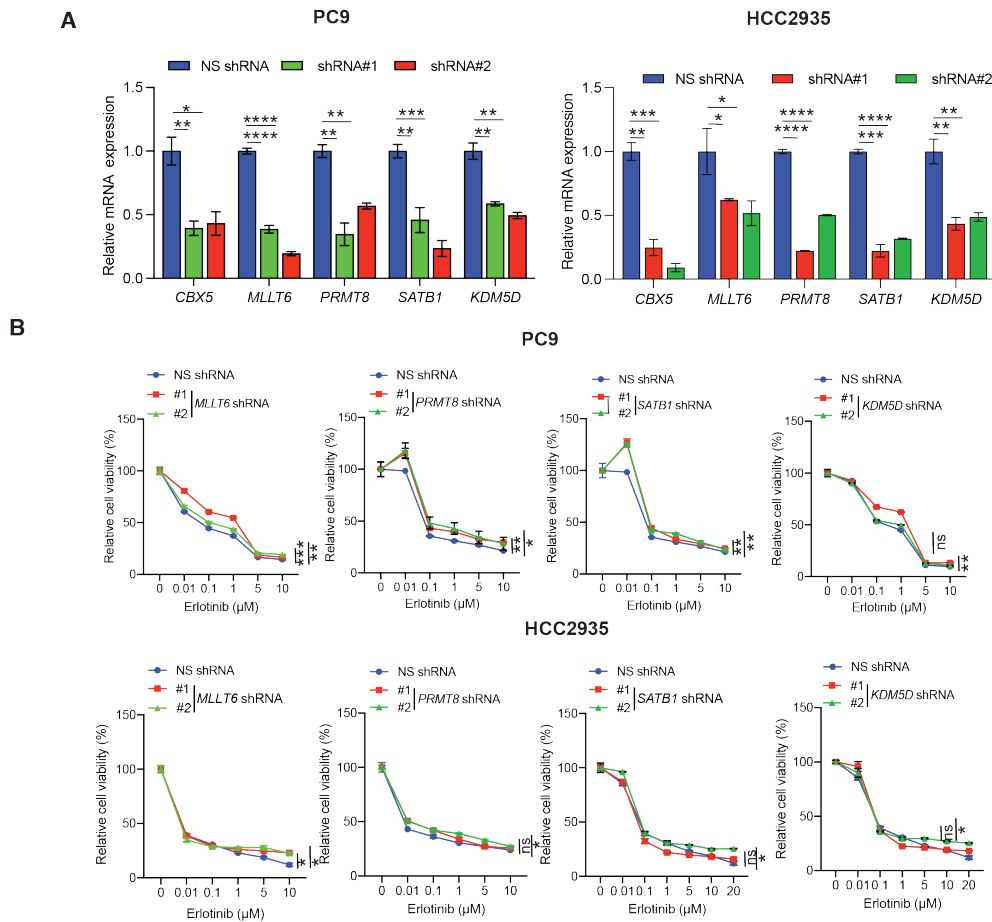

**Fig. S2.** Knockdown validation, cell survival assays, and expression of candidates identified from the large-scale epigenome-wide shRNA screen. (A) Expression of the indicated genes in PC9 and HCC2935 cells expressing shRNAs targeting those genes analyzed by qRT-PCR; mRNA expression of the indicated genes in knockdown cells relative to NS shRNA-expressing cells is plotted. (B) Relative cell viability (%) of PC9 and HCC2935 cells expressing an NS shRNA or shRNAs targeting the indicated genes treated for 5 days with the indicated concentrations of erlotinib or DMSO (0), as measured by MTT assay. Data are presented as the mean  $\pm$  SEM. ns = not significant; \*  $P < 0.05$ , \*\*  $P < 0.01$ , \*\*\*  $P < 0.001$ , and \*\*\*\*  $P < 0.0001$ .

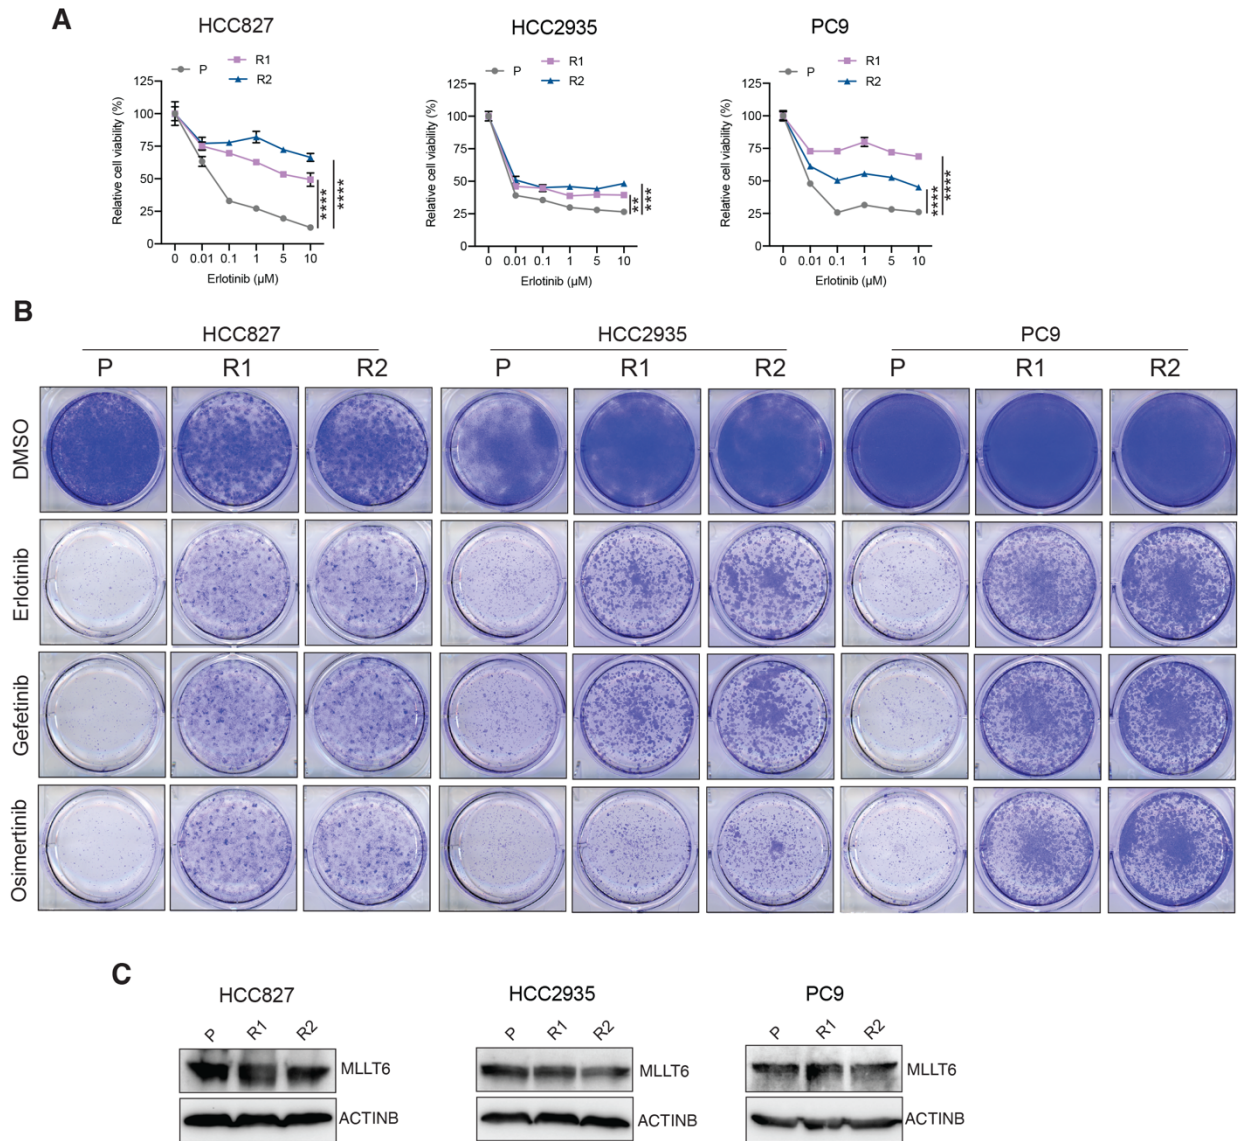

**Fig. S3.** Validation of EGFRi-resistant LAUD cell lines. (A) Relative cell viability (%) of parental (P) and EGFRi-resistant HCC827, HCC2935, and PC9 cell lines (R1, R2) treated with erlotinib or DMSO at indicated concentrations for 5 days, as measured by MTT assay. (B) The indicated EGFRi-resistant LUAD cell lines were treated with erlotinib, gefitinib or osimertinib (250 nM for erlotinib and gefitinib, 100 nM for osimertinib) or DMSO, and survival was measured in clonogenic assays. Representative wells for cells grown under the indicated conditions are shown. (C) Immunoblot analysis measuring MLLT6 expression in the indicated EGFRi-sensitive or EGFRi-resistant EGFR-mutant LUAD cell lines. Data are presented as the mean  $\pm$  SEM. \*\* $P < 0.01$ , \*\*\* $P < 0.001$ , and \*\*\*\* $P < 0.0001$ .

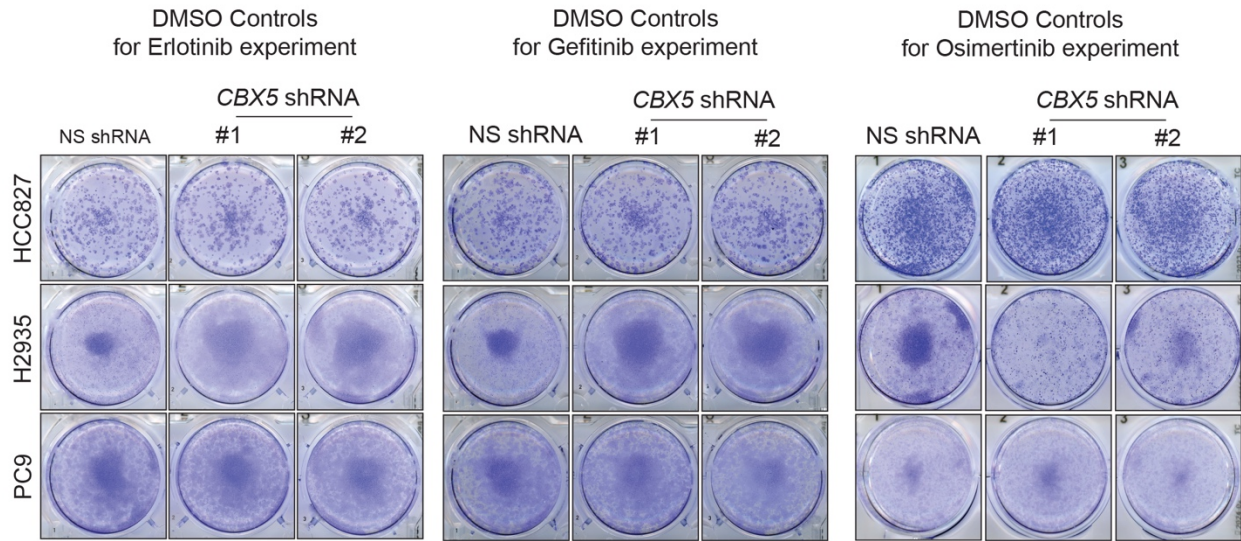

**Fig. S4.** Control wells from clonogenic assays. Representative DMSO-treated control wells from clonogenic assays with the indicated LUAD cell lines expressing an NS or *CBX5* shRNA are shown (related to Fig. 1D).

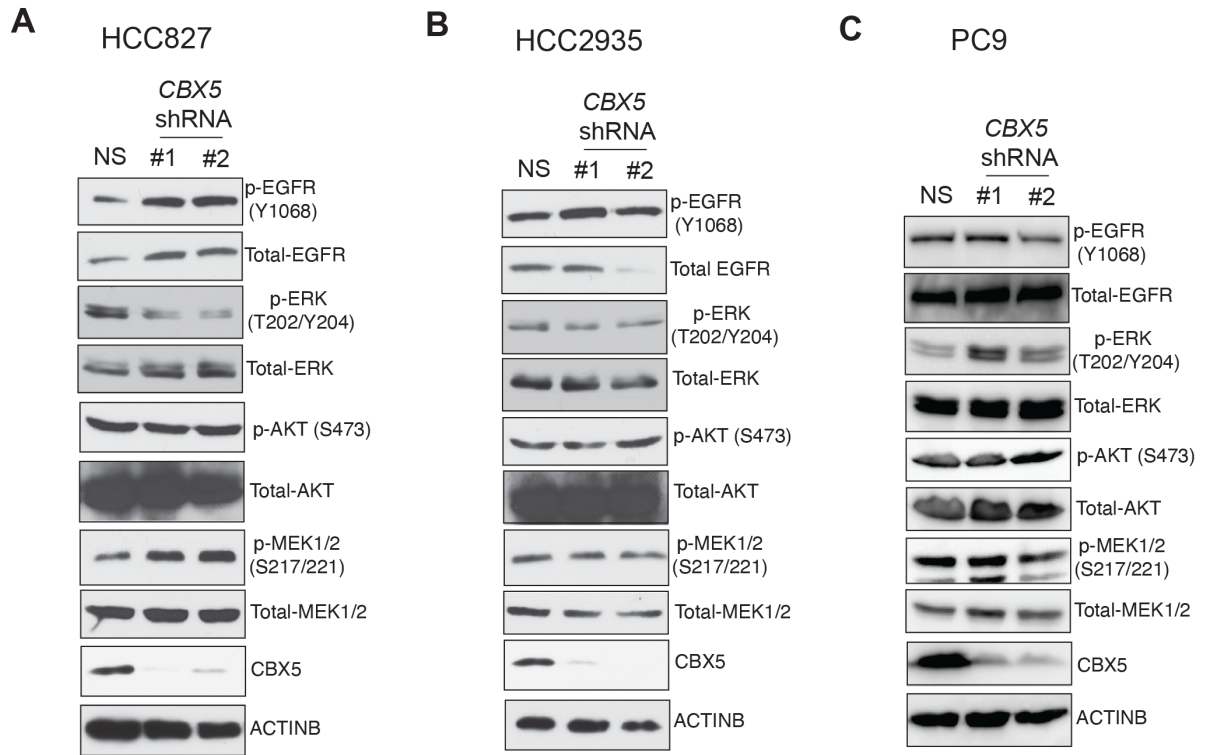

**Fig. S5.** Measurement of EGFR and other downstream signaling pathways in *CBX5*-knockdown EGFR-mutant LUAD cells. Immunoblot analysis measuring expression of the indicated proteins in EGFR-mutant LUAD cell lines expressing an NS or *CBX5* shRNA. ACTINB was used as a loading control.



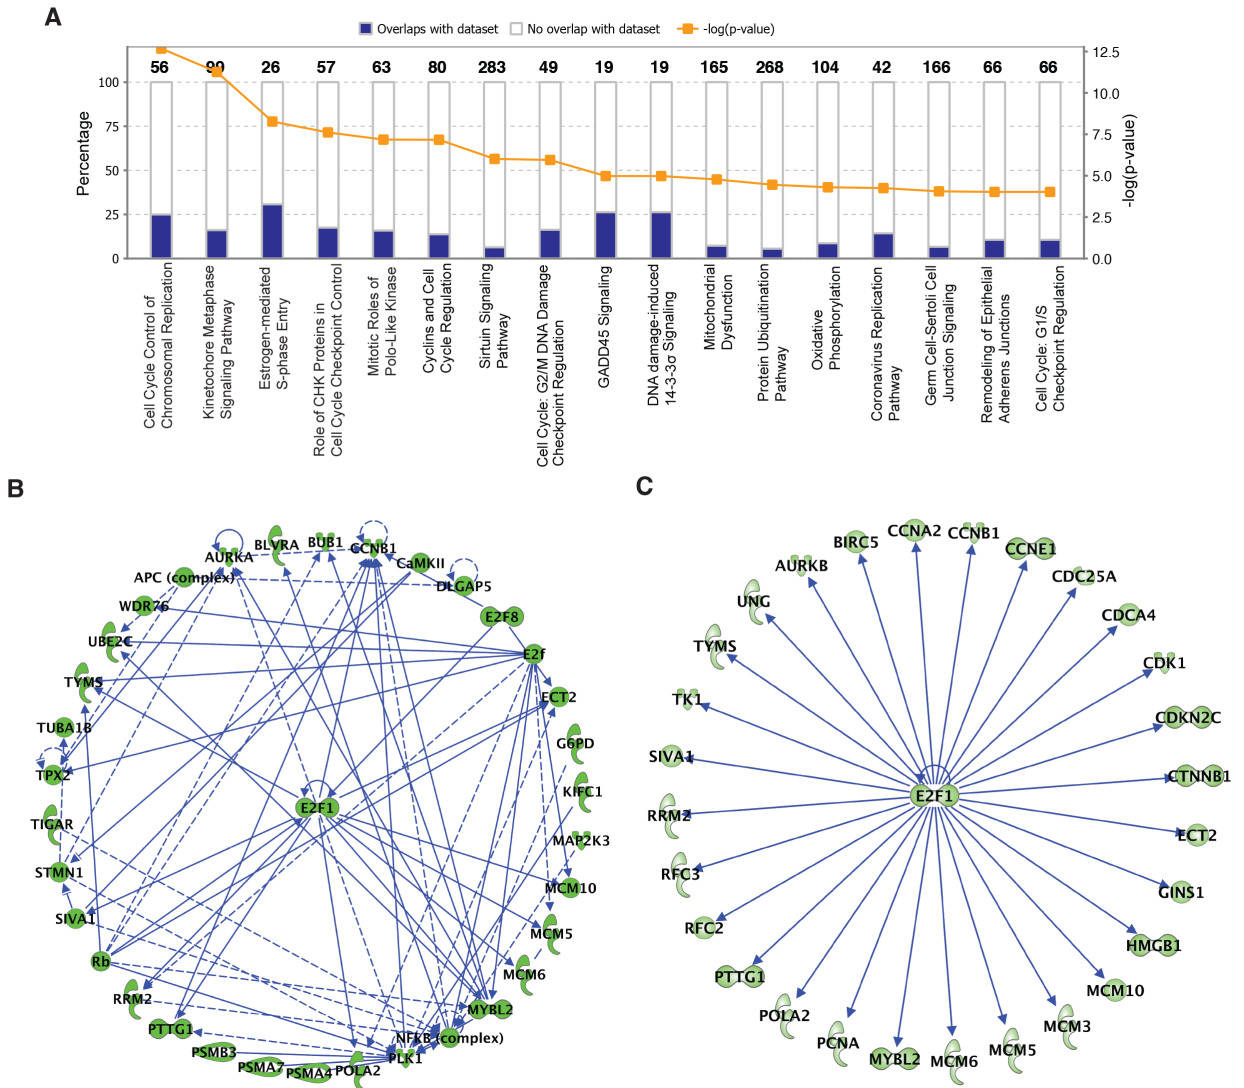

**Fig. S6.** Ingenuity pathway analysis identifies E2F1 as a major upstream regulator of genes upregulated in *CBX5*-knockdown cells. (A) Key biological pathways enriched among genes upregulated in *CBX5*-knockdown HCC827 cells identified by RNA-seq. (B, C) Pathway map for E2F1-regulated genes identified from RNA-seq analysis of *CBX5*-knockdown HCC827 cells.

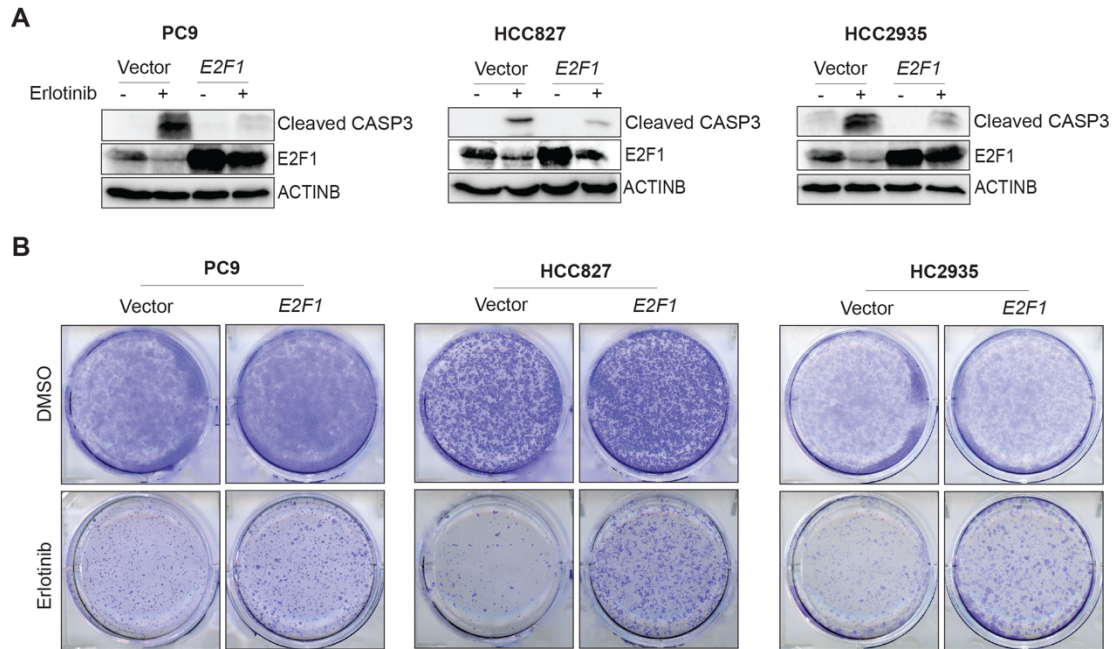

**Fig. S7.** E2F1 is a downstream mediator of CBX5-loss-driven EGFRi resistance in EGFR-mutant LUAD. (A) Immunoblot analysis measuring expression of the indicated proteins in LAUD cell lines overexpressing E2F1 or empty vector, treated with DMSO or erlotinib (50 nM) for 24 h. (B) The indicated LAUD cancer cell lines overexpressing E2F1 or vector were treated with erlotinib (20 nM for HCC827 and PC9; 100 nM for HCC2935) or DMSO, and survival was measured in clonogenic assays.

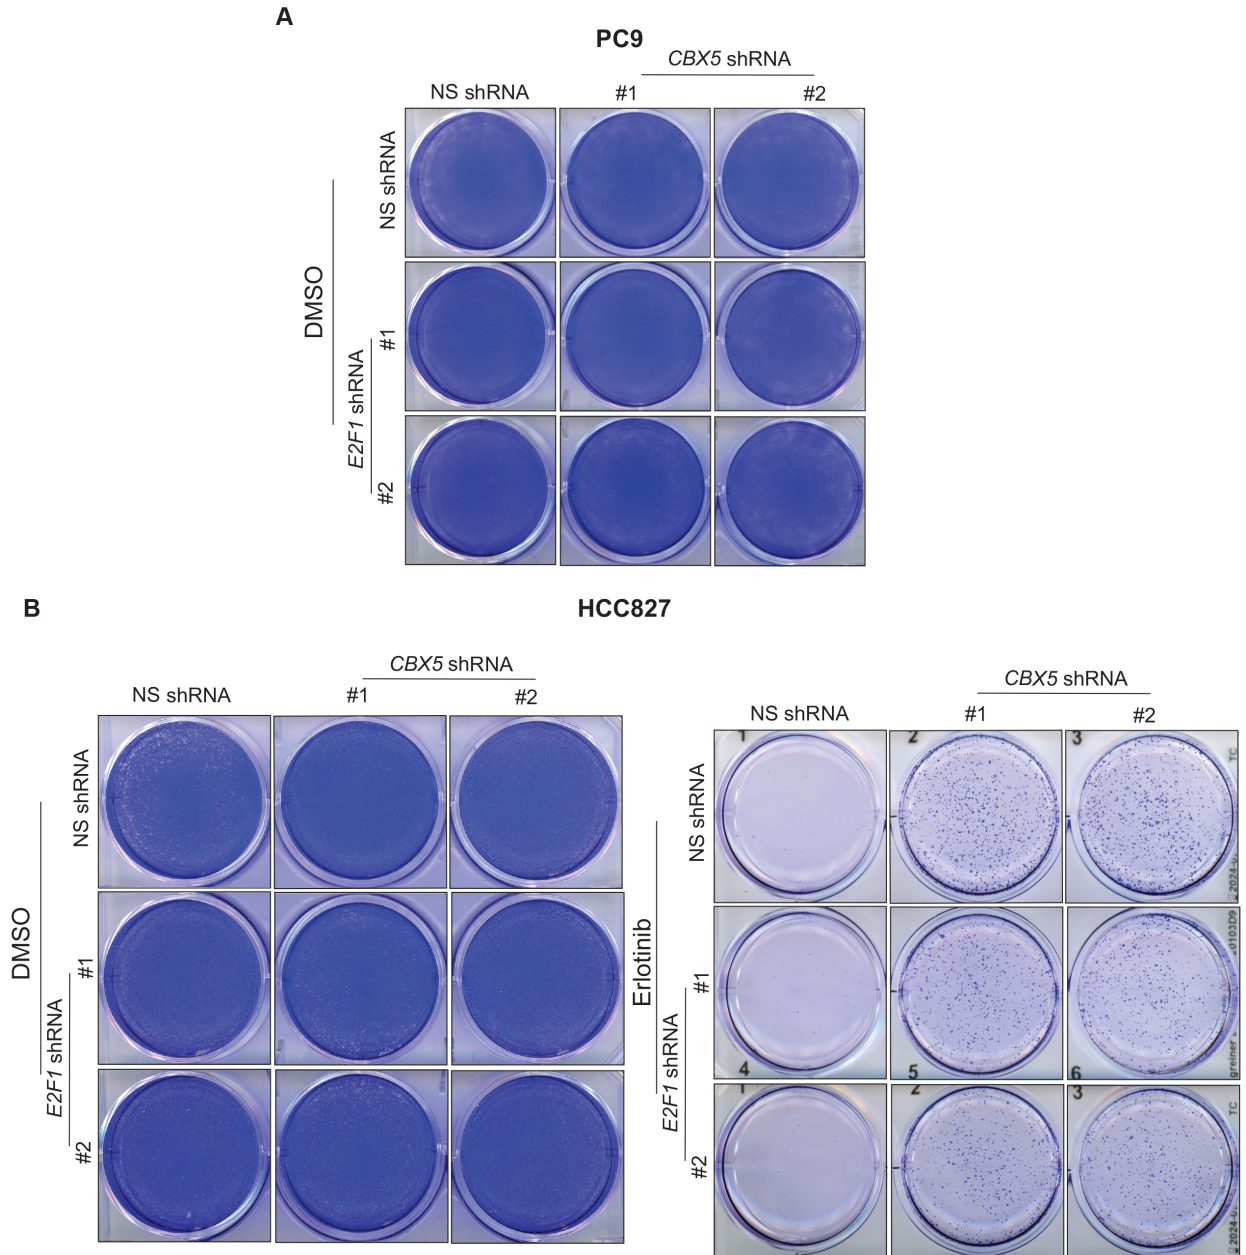

**Fig. S8.** E2F1 is necessary for CBX5-loss-induced resistance to EGFRi. (A) Representative DMSO-treated control wells from clonogenic assays with PC9 cells expressing an NS or CBX5 shRNA alone, or in combination with an *E2F1* shRNA, are shown (related to Figure 2E). (B) Representative wells from clonogenic assays with HCC827 cells expressing an NS or CBX5 shRNA alone, or in combination with an *E2F1* shRNA, were treated with DMSO (left) or erlotinib (50 nM, right), and survival was measured in clonogenic assays.

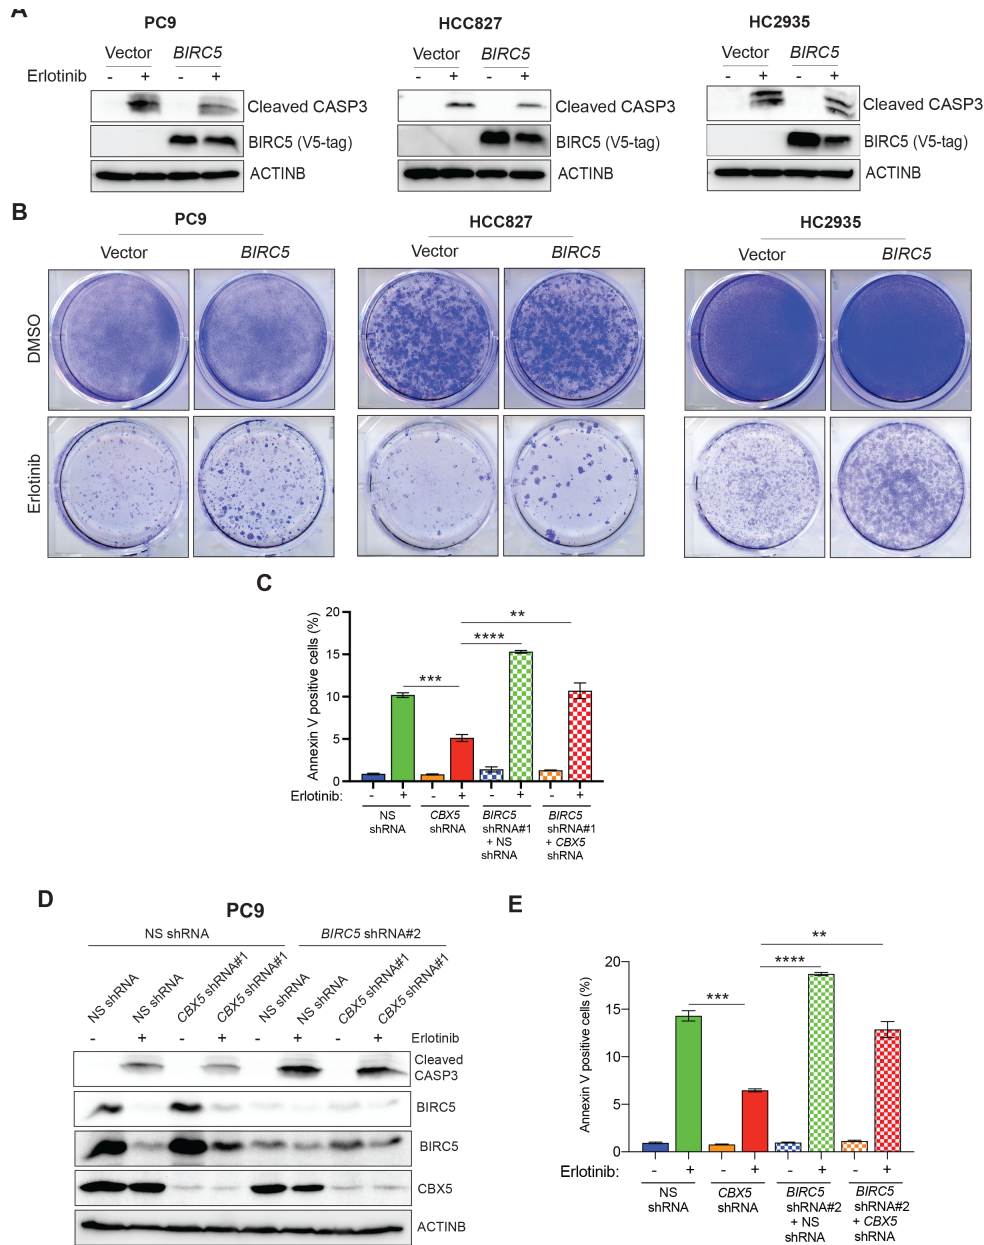

**Fig. S9.** BIRC5 is a downstream mediator of CBX5-loss-driven EGFRi resistance in EGFR-mutant LUAD. (A) Immunoblot analysis measuring expression of the indicated proteins in LAUD cell lines overexpressing BIRC5 or vector, treated with DMSO or erlotinib (50 nM) for 24 h. (B) The indicated LAUD cancer cell lines overexpressing BIRC5 or vector were treated with erlotinib (20 nM for HCC827 and PC9; 100 nM for HCC2935) or DMSO, and survival was measured in clonogenic assays. (C) PC9 cells expressing an NS or *CBX5* shRNA alone, or in combination with an NS or *BIRC5* shRNA#1, were treated with DMSO or erlotinib (50 nM) for 24 h and then analyzed by FACS-based annexin V-PE staining. % of Annexin V positive cells at indicated conditions is shown. (D) PC9 cells expressing an NS or *CBX5* shRNA alone, or in conjunction with *BIRC5* shRNA#2, were treated with DMSO or erlotinib (50 nM) for 24 h, and expression of the indicated proteins was measured by immunoblot analysis. (E) PC9 cells expressing an NS or *CBX5* shRNA alone, or in combination with an NS shRNA or *BIRC5* shRNA#2, were treated with DMSO or erlotinib (50 nM) for 24 h and then analyzed by FACS-based annexin V-PE staining. % of Annexin V positive cells at indicated conditions is shown. Data are presented as the mean  $\pm$  SEM. \*\* $P < 0.01$ , \*\*\* $P < 0.001$ , and \*\*\*\* $P < 0.0001$ .

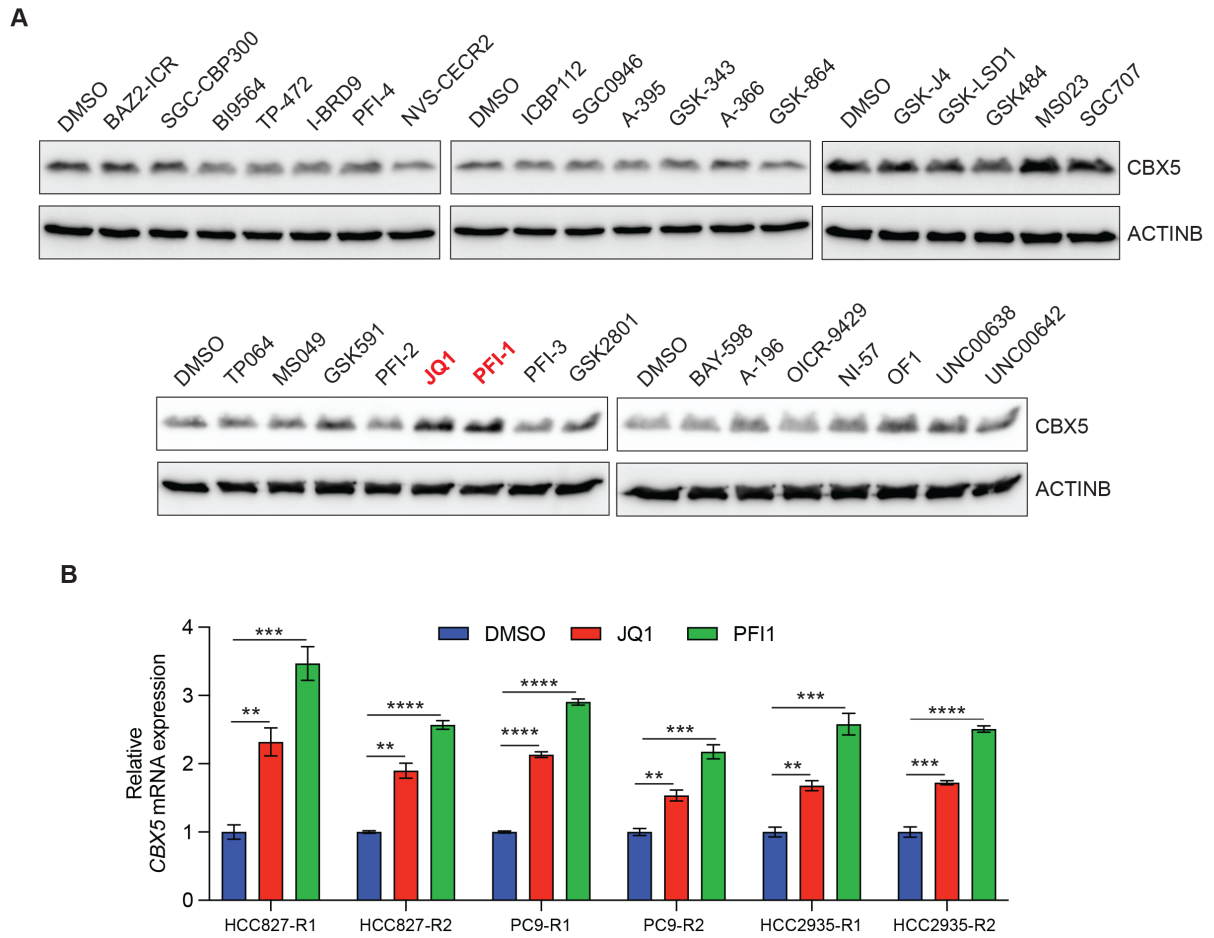

**Fig. S10.** Epigenetic regulation of *CBX5* expression in EGFRi-resistant cell lines. (A) EGFRi-resistant PC9 cells (PC9-R2) were treated with DMSO or the indicated small-molecule inhibitors at the concentrations shown in Table S2 for 48 h, and expression of *CBX5* was measured by immunoblot analysis. (B) The indicated EGFRi-resistant cell lines were treated with DMSO or BETi JQ1 (2  $\mu$ M) or PFI-1 (2  $\mu$ M) for 48 h, and expression of *CBX5* was measured by qRT-PCR. Relative *CBX5* mRNA expression in BETi-treated cells relative to DMSO-treated cells is plotted. Data are presented as the mean  $\pm$  SEM. \*\* $P$ <0.01, \*\*\* $P$ <0.001, and \*\*\*\* $P$ <0.0001.

**A**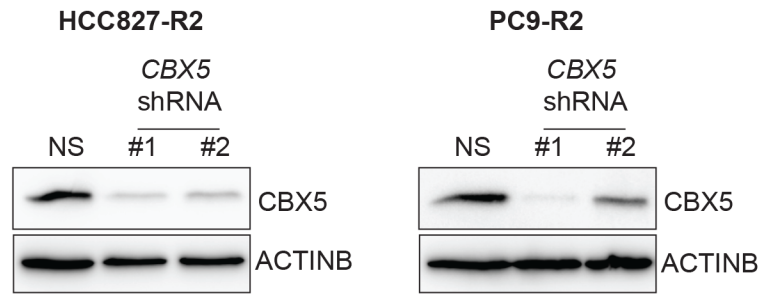**B**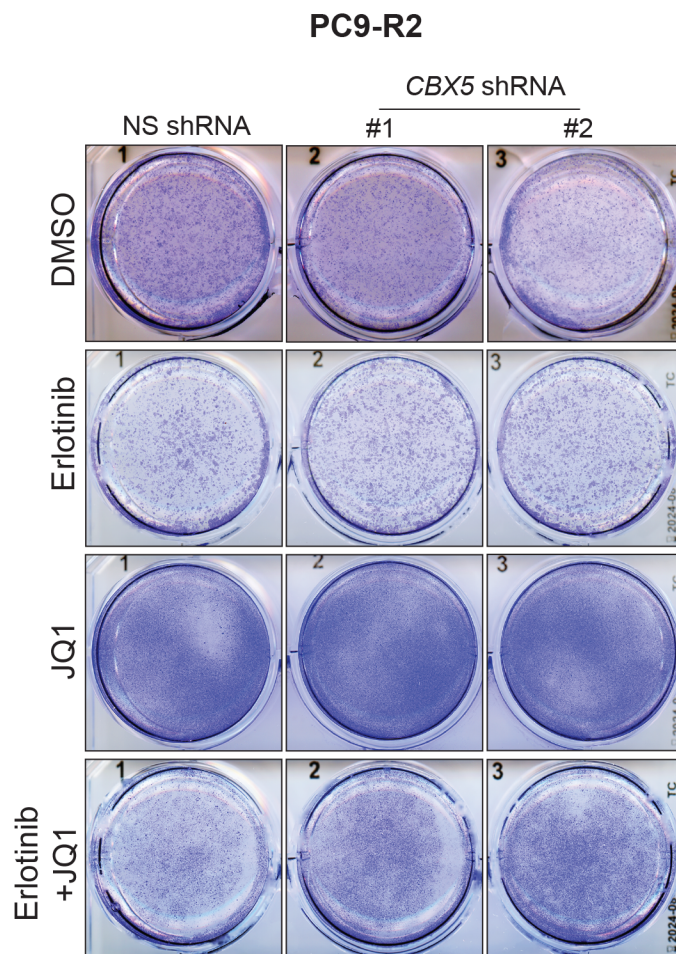

**Fig. S11.** BETi treatment sensitizes EGFRi-resistant cells to EGFRi. (A) Immunoblot analysis measuring CBX5 expression in the indicated EGFRi resistant LUAD cell lines (HCC827-R2 and PC9-R2). (B) PC9-R2 cells expressing an NS or CBX5 shRNA were treated with DMSO, erlotinib (25 nM), JQ1 (0.125  $\mu$ M), or a combination of erlotinib (25 nM) + JQ1 (0.125  $\mu$ M), and survival was measured in clonogenic assays. Representative wells for cells grown under the indicated conditions are shown.

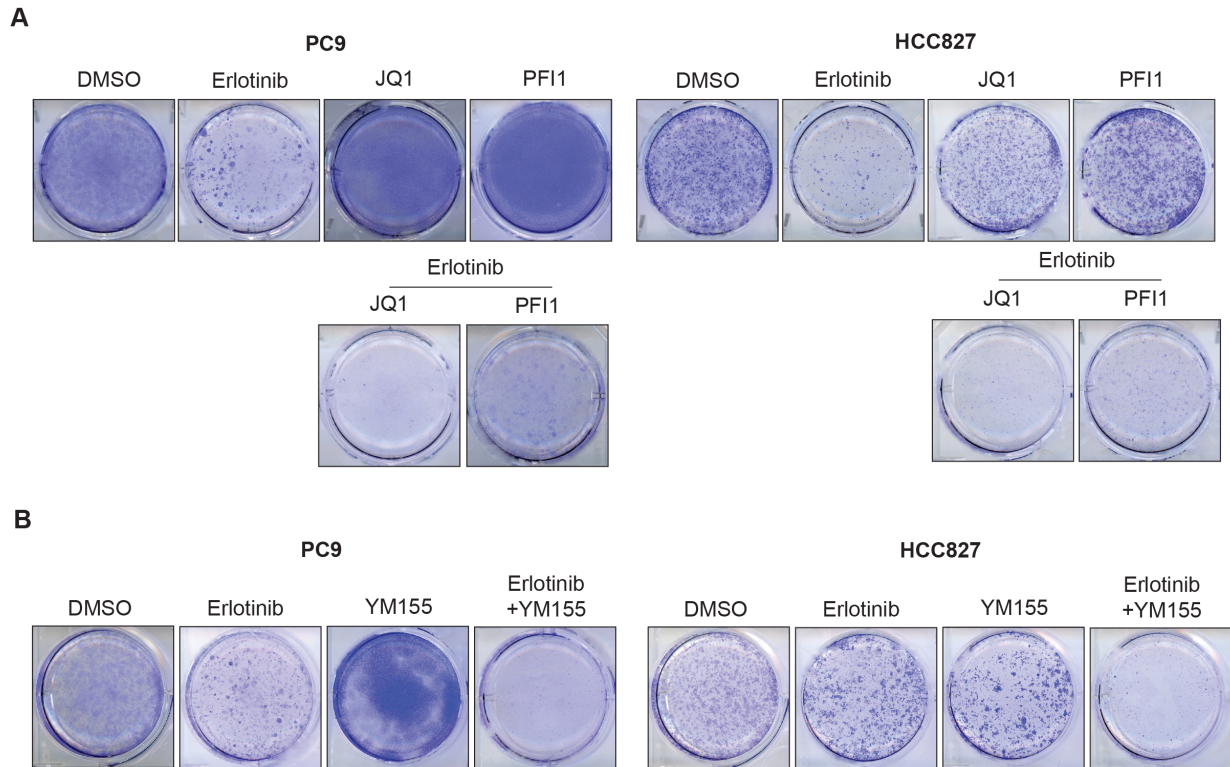

**Fig. S12.** BETi and BIRC5 inhibitors forestall development of EGFRi resistance in EGFR-mutant LUAD cells. (A) The indicated LUAD cell lines were treated with DMSO, erlotinib (25 nM), JQ1 (250 nM for PC9; 500 nM for HCC827), or PF11 (250 nM for PC9; 500 nM for HCC827) alone, or with a combination of erlotinib (25 nM) + JQ1 (250 nM for PC9; 500 nM for HCC827) or erlotinib (25 nM) + PFI (250 nM for PC9; 500 nM for HCC827), and survival was measured in clonogenic assays. Representative wells for the indicated cell lines under the indicated treatment conditions are shown. (B) The indicated LUAD cell lines were treated with DMSO, erlotinib (25 nM), or YM155 (40 nM for PC9; 2.5 nM for HCC827) alone, or with a combination of erlotinib (25 nM) + YM155 (40 nM for PC9; 2.5 nM for HCC827), and survival was measured in clonogenic assays. Representative wells for the indicated cell lines under the indicated treatment conditions are shown.

**Table S1.** Genes identified as drivers of resistance to the EGFRi erlotininb in EGFR-mutant HCC827 LUAD cells.

| <b>S.No.</b> | <b>Gene Symbol</b> | <b>Gene Name</b>                           | <b>Accession number</b> | <b>Gene ID</b> |
|--------------|--------------------|--------------------------------------------|-------------------------|----------------|
| 1            | CXB5               | Chromobox 5                                | NM_001127322.1          | 23468          |
| 2            | KDM5D              | Lysine-Specific Demethylase 5D             | NM_001146705.1          | 8284           |
| 3            | MLLT6              | Mixed-Lineage Leukemia, Translocated To, 6 | NM_005937.3             | 4302           |
| 4            | PRMT8              | Protein Arginine Methyltransferase 8       | NM_019854.4             | 56341          |
| 5            | SATB1              | Special AT-rich Sequence Binding Protein 1 | NM_001195470.2          | 6304           |
| 6            | SIRT4              | Sirtuin 4                                  | NM_012240.2             | 23409          |



**Table S2.** List of inhibitors targeting indicated chromatin modifiers and the concentrations at which they were used in the chemical genetic screen.

| S.No. | Target protein        | Inhibitor   | Inhibitor concentration ( $\mu\text{m}$ ) |
|-------|-----------------------|-------------|-------------------------------------------|
| 1     | BAZ2A/2B              | BAZ2-ICR    | 1                                         |
| 2     | BAZ2A/2B              | GSK2801     | 1                                         |
| 3     | BET family            | JQ1         | 1                                         |
| 4     | BET family            | PF11        | 1                                         |
| 5     | BRD9/7                | BI-9564     | 1                                         |
| 6     | BRD9/7                | TP-472      | 1                                         |
| 7     | BRD9                  | I-BRD9      | 1                                         |
| 8     | BRPF1/2/3; BRPF1B     | NI-57       | 1                                         |
| 9     | BRPF1/2/3; BRPF1B     | OF1         | 1                                         |
| 10    | BRPF1/2/3; BRPF1B     | PFI-4       | 1                                         |
| 11    | CECR2                 | NVS-CECR2-1 | 1                                         |
| 12    | CREBBP, EP300         | I-CBP112    | 1                                         |
| 13    | CREBBP, EP300         | SGC-CBP30   | 1                                         |
| 14    | DOT1L                 | SGC0946     | 1                                         |
| 15    | EED                   | A-395       | 1                                         |
| 16    | EZH2/H1               | GSK343      | 3                                         |
| 17    | G9a (EHMT2)/GLP       | A-366       | 1                                         |
| 18    | G9a (EHMT2)/GLP       | UNC0638     | 1                                         |
| 19    | G9a (EHMT2)/GLP       | UNCO642     | 1                                         |
| 20    | IDH1 mutant           | GSK864      | 1                                         |
| 21    | JMJD3/UTX (KDM6A/B)   | GSK-J4      | 5                                         |
| 22    | LSD1 (KDM1A)          | GSK-LSD1    | 1                                         |
| 23    | PAD4 (PADI4)          | GSK484      | 10                                        |
| 24    | PRMT Type I           | MS023       | 1                                         |
| 25    | PRMT3                 | SGC707      | 1                                         |
| 26    | PRMT4                 | TP-064      | 1                                         |
| 27    | PRMT4/6               | MS049       | 5                                         |
| 28    | PRMT5                 | GSK591      | 1                                         |
| 29    | SETD7                 | ®-PFI-2     | 1                                         |
| 30    | SMARCA2/4, PB1        | PFI-3       | 1                                         |
| 31    | SMYD2                 | BAY-598     | 1                                         |
| 32    | SUV420H1/H2 (KMT5B/C) | A-196       | 1                                         |
| 33    | WDR5                  | OICR-9429   | 3                                         |

**Table S3.** List of reagents and software used in this study with source and identifiers.

| REAGENT or RESOURCE                               | SOURCE                    | IDENTIFIER                      |
|---------------------------------------------------|---------------------------|---------------------------------|
| Antibodies                                        |                           |                                 |
| CBX5                                              | Cell Signaling Technology | Cat# 2616; RRID:AB_2070987      |
| Cleaved Caspase 3                                 | Cell Signaling Technology | Cat# 9664S; RRID:AB_2070042     |
| P-EGFR(Y1068)                                     | Cell Signaling Technology | Cat# 8543S; RRID:AB_10828604    |
| P-Akt(S473)                                       | Cell Signaling Technology | Cat#4060; RRID:AB_2315049       |
| Akt                                               | Cell Signaling Technology | Cat#9272; RRID:AB_329827        |
| p-ERK(T202/Y204)                                  | Cell Signaling Technology | Cat# 4376S; RRID:AB_331772      |
| ERK                                               | Cell Signaling Technology | Cat# 4695S; RRID:AB_390779      |
| P-MEK(S217/221)                                   | Cell Signaling Technology | Cat# 9121S; RRID:AB_331648      |
| MEK                                               | Cell Signaling Technology | Cat# 9122S; RRID:AB_823567      |
| V5-Tag (D3H8Q)                                    | Cell Signaling Technology | Cat# 13202S; RRID:AB_2687461    |
| MLLT6                                             | Bethyl Laboratories       | Cat# A302-198A; RRID:AB_1659777 |
| Survivin (BIRC5)                                  | Cell Signaling Technology | Cat#2808; RRID:AB_2063948       |
| E2F1                                              | Cell Signaling Technology | Cat# 3742; RRID:AB_2096936      |
| $\beta$ -Actin (D6A8)                             | Cell Signaling Technology | Cat#4970; RRID:AB_2223172       |
| Chemicals, peptides, and recombinant proteins     |                           |                                 |
| Erlotinib                                         | Selleck Chemical LLC      | Cat# S1023                      |
| Gefitinib                                         | Selleck Chemical LLC      | Cat# S1025                      |
| Osimeritinb                                       | Selleck Chemical LLC      | Cat# S7297                      |
| JQ1                                               | Selleck Chemical LLC      | Cat# S7110                      |
| PFI1                                              | Selleck Chemical LLC      | Cat# S1216                      |
| YM155                                             | Selleck Chemical LLC      | Cat# S1130                      |
| SGC- Epigenetic Probe Library                     | Cayman Chemicals          | Cat# 17525                      |
| DMEM                                              | GIBCO                     | Cat# 11965-092                  |
| RPMI                                              | GIBCO                     | Cat# 11875-093                  |
| Fetal Bovine Serum                                | GIBCO                     | Cat# 10437-028                  |
| Trypsin-EDTA                                      | GIBCO                     | Cat# 25200-056                  |
| Penicillin-Streptomycin                           | GIBCO                     | Cat# 15140-122                  |
| Effectene Transfection Reagent                    | QIAGEN                    | Cat# 301427                     |
| Critical commercial assays                        |                           |                                 |
| CUT&RUN Assay Kit                                 | Cell Signaling Technology | Cat# 86652                      |
| Annexin V assay kit                               | BD Pharmingen             | Cat#559763                      |
| Deposited data                                    |                           |                                 |
| RNA-Seq performed with HCC827CBX5 knockdown cells | This paper                | GEO: GSE114563                  |
| Experimental models: Cell lines                   |                           |                                 |
| HEK-293T                                          | ATCC                      | CRL-11268                       |
| HCC827                                            | ATCC                      | CRL-2868                        |

|                                                    |                                                                   |                                                                                                          |
|----------------------------------------------------|-------------------------------------------------------------------|----------------------------------------------------------------------------------------------------------|
| HCC2935                                            | ATCC                                                              | CRL-2869                                                                                                 |
| PC9                                                | Sigma-Aldrich                                                     | Cat# 90071810                                                                                            |
| Experimental models: Organisms/strains             |                                                                   |                                                                                                          |
| Mouse: NSG                                         | Jackson Laboratory                                                | Stock No. 005557                                                                                         |
| Oligonucleotides                                   |                                                                   |                                                                                                          |
| <i>BIRC5</i>                                       | CGTCCGGTTGCGCTTTCCTT                                              | ATGGCACGGCGCACTTTCTC                                                                                     |
| <i>CBX5</i>                                        | TCCTGAGGATGCGGAAAACA                                              | AGGAGAGGAGGCAGGGAGGT                                                                                     |
| <i>KAT6A</i>                                       | CCAGAATGTTTGCCTGGAC                                               | CTGGCACTGTGGCTCTTCGT                                                                                     |
| <i>KDM5D</i>                                       | CCAGTGTGCAGGGGAGTTTG                                              | AGCCGGCGGTAGTGTTCAAT                                                                                     |
| <i>MLLT6</i>                                       | AATCCCCTCCTCTCCCAAGC                                              | GCAGAGGCTGTCTGGTCGAA                                                                                     |
| <i>PRMT8</i>                                       | TGCTCCCTACACCCACTGGA                                              | TTTGGCATTGGCTTCATGG                                                                                      |
| <i>SATB1</i>                                       | CACCACCCTTGGGAAAGGAG                                              | TTGCTGCTGCTGTTGCTGAG                                                                                     |
| <i>SIRT4</i>                                       | TGCCAGCAAGTCCTCCTCTG                                              | TCCGGACAAAATCACCATGC                                                                                     |
| <i>E2F1</i>                                        | TCCAAGAACCACATCCAGTG                                              | CTGGGTCAACCCCTCAAG                                                                                       |
| <i>ACTINB</i>                                      | GCATGGAGTCCTGTGGCATC                                              | TTCTGCATCCTGTCCGCAAT                                                                                     |
| <i>E2F1</i> (CUT&RUN Primer)                       | GCCTTCCGGTTTCCACAGC                                               | TCTGCAAACCTGGGTGCACAT                                                                                    |
| <i>BIRC5</i> (CUT&RUN primer)                      | TCTCAGCTACTCGGGAGGCT                                              | AGCTCACTGCAACCTCCTCCC                                                                                    |
| <i>ACTINB</i> (CUT&RUN Primer)                     | TCTTGGCTGGGCGTGACTGT                                              | AAGGTGGGCTCTACAGGGCA                                                                                     |
| Plasmids, ORFs and shRNAs                          |                                                                   |                                                                                                          |
| pLKO.1                                             | Addgene                                                           | Cat No# 10878                                                                                            |
| pMD2.G                                             | Addgene                                                           | Cat No# 12259                                                                                            |
| psPAX2                                             | Addgene                                                           | Cat No# 12260                                                                                            |
| pZIPZ NS shRNA                                     | Open Biosystems                                                   | Cat No# RHS4346                                                                                          |
| TRC NS shRNA                                       | Open Biosystems                                                   | Cat No# RHS6848                                                                                          |
| pLX304-BIRC5                                       | Open Biosystems                                                   | Cat No# OHS6085-213578374                                                                                |
| <i>KDM5D</i>                                       | RHS4430-101102580                                                 |                                                                                                          |
| <i>MLLT6</i>                                       | RHS4430-101161520                                                 |                                                                                                          |
| <i>PRMT8</i>                                       | RHS4430-101070759                                                 |                                                                                                          |
| <i>STAB1</i>                                       | RHS4430-101165442                                                 | RHS4430-101169043                                                                                        |
| <i>SIRT4</i>                                       | RHS4430-101103028                                                 | RHS4430-101102122                                                                                        |
| <i>E2F1</i>                                        | TRCN0000000250                                                    | TRCN0000000251                                                                                           |
| <i>BIRC5</i>                                       | TRCN0000073718                                                    | TRCN0000073721                                                                                           |
| Software and algorithms                            |                                                                   |                                                                                                          |
| Prism 8.0                                          | GraphPad                                                          | <a href="http://www.graphpad.com/scientificsoftware/prism">www.graphpad.com/scientificsoftware/prism</a> |
| ImageJ                                             | <a href="https://imagej.nih.gov/ij">https://imagej.nih.gov/ij</a> | N/A                                                                                                      |
| Reactome pathway analysis from RNA sequencing data | Reactome Pathway Database                                         | <a href="https://reactome.org/">https://reactome.org/</a>                                                |
| Flowjo                                             | <a href="https://www.flowjo.com/">https://www.flowjo.com/</a>     | N/A                                                                                                      |

**Dataset S1.** List of genes targeted by the human epigenome-wide shRNA library and shRNA IDs.

**Dataset S2.** List of genes identified from the RNA-seq analysis measuring changes in mRNA expression following *CBX5* knockdown.

**Dataset S3.** Ingenuity Pathway Analysis.

## SI References

1. A. Dobin A *et al.*, STAR: ultrafast universal RNA-seq aligner. *Bioinformatics* **29**,15-21 (2013).
2. L. Wang, S. Wang, W. Li, RSeQC: quality control of RNA-seq experiments. *Bioinformatics* **28**, 2184-2185 (2012).
3. P. Ewels, M. Magnusson, S. Lundin, M. Kaller, MultiQC: summarize analysis results for multiple tools and samples in a single report. *Bioinformatics* **32**, 3047-3048 (2016).
4. H. Li *et al.*,The Sequence Alignment/Map format and SAMtools. *Bioinformatics* **25**, 2078-2079 (2009).
5. H. Thorvaldsdottir, J.T. Robinson, J.P. Mesirov, Integrative Genomics Viewer (IGV): high-performance genomics data visualization and exploration. *Brief Bioinform* **14**, 178-192 (2013).
6. M.I. Love, W. Huber W, S. Anders, Moderated estimation of fold change and dispersion for RNA-seq data with DESeq2. *Genome Biol* **15**, 550 (2014).
7. H. Heberle, G.V. Meirelles, F.R. da Silva, G.P. Telles, R. Minghim, InteractiVenn: a web-based tool for the analysis of sets through Venn diagrams. *BMC Bioinformatics* **16**, 169 (2015).
