# Supplementary material for: CBX5 loss drives EGFR inhibitor resistance and results in therapeutically actionable vulnerabilities in lung cancer
Source: PubMed Central journal article supplement — Proc Natl Acad Sci U S A. 2023 Jan 18;120(4):e2218118120. doi: 10.1073/pnas.2218118120 (PMC9942844; doi:10.1073/pnas.2218118120), 2023-01-18
Supplement: pnas.2218118120.sd01.pdf [file pnas.2218118120.sd01.pdf]

**Dataset S1.** List of genes targeted by the human epigenome-wide shRNA library and shRNA IDs.

| S.No. | Gene Name     | shRNA IDs                                                                                                |
|-------|---------------|----------------------------------------------------------------------------------------------------------|
| 1     | 2410016O06Rik | TRCN0000180487                                                                                           |
| 2     | ACTL6A        | TRCN0000072273<br>TRCN0000072274<br>TRCN0000072275<br>TRCN0000072277<br>TRCN0000072276                   |
| 3     | ACTL6B        | TRCN0000116767<br>TRCN0000116768<br>TRCN0000116769<br>TRCN0000116770<br>TRCN0000116771                   |
| 4     | AIRE          | TRCN0000018890<br>TRCN0000018891<br>TRCN0000018892<br>TRCN0000018893<br>TRCN0000018894                   |
| 5     | ALKBH2        | TRCN0000064678<br>TRCN0000064679<br>TRCN0000064680<br>TRCN0000064681<br>TRCN0000064682                   |
| 6     | AOF1/KDM1B    | TRCN0000046073<br>TRCN0000046074<br>TRCN0000046076<br>TRCN0000046075<br>TRCN0000046077                   |
| 7     | AOF2          | TRCN0000046068<br>TRCN0000046069<br>TRCN0000046070<br>TRCN0000046071<br>TRCN0000046072                   |
| 8     | APITD1        | TRCN0000038878<br>TRCN0000038874<br>TRCN0000191787                                                       |
| 9     | ARID1A        | TRCN0000059089<br>TRCN0000059090<br>TRCN0000059092<br>TRCN0000059088<br>TRCN0000059091<br>TRCN0000071394 |

|    |        |                                                                                        |
|----|--------|----------------------------------------------------------------------------------------|
|    |        | TRCN0000071397                                                                         |
| 10 | ARID3C | TRCN0000201971                                                                         |
| 11 | ARID4A | TRCN0000014595<br>TRCN0000014593<br>TRCN0000014594<br>TRCN0000014596<br>TRCN0000014597 |
| 12 | ASF1A  | TRCN0000074268<br>TRCN0000074269<br>TRCN0000074271<br>TRCN0000074272<br>TRCN0000074270 |
| 13 | ASF1B  | TRCN0000074225<br>TRCN0000074226<br>TRCN0000074227<br>TRCN0000108962                   |
| 14 | ASH1L  | TRCN0000016168<br>TRCN0000016169<br>TRCN0000016170<br>TRCN0000016171<br>TRCN0000016172 |
| 15 | ASH2L  | TRCN0000019274<br>TRCN0000019275<br>TRCN0000019276<br>TRCN0000019277<br>TRCN0000019278 |
| 16 | ASXL1  | TRCN0000135296<br>TRCN0000138572<br>TRCN0000133699<br>TRCN0000134690<br>TRCN0000135579 |
| 17 | ATM    | TRCN0000010299<br>TRCN0000038654<br>TRCN0000039948                                     |
| 18 | ATR    | TRCN0000039614<br>TRCN0000007749<br>TRCN0000023912<br>TRCN0000023913                   |
| 19 | ATRX   | TRCN0000013588<br>TRCN0000013589<br>TRCN0000013590<br>TRCN0000013591<br>TRCN0000013592 |
| 20 | AURKB  | TRCN0000000776                                                                         |

|    |       |                                                                                                                                                                                                          |
|----|-------|----------------------------------------------------------------------------------------------------------------------------------------------------------------------------------------------------------|
|    |       | TRCN0000010547<br>TRCN0000000777<br>TRCN0000000778<br>TRCN0000000779                                                                                                                                     |
| 21 | BAZ1A | TRCN0000034279<br>TRCN0000034280<br>TRCN0000034281<br>TRCN0000034282<br>TRCN0000034283                                                                                                                   |
| 22 | BAZ1B | TRCN0000013339<br>TRCN0000013342<br>TRCN0000013340<br>TRCN0000013341<br>TRCN0000013338<br>TRCN00000108939                                                                                                |
| 23 | BAZ2A | TRCN0000015568<br>TRCN0000015569<br>TRCN0000015571<br>TRCN0000015572<br>TRCN0000015570                                                                                                                   |
| 24 | BAZ2B | TRCN0000019928<br>TRCN0000019924<br>TRCN0000019926<br>TRCN0000019925<br>TRCN0000019927<br>TRCN00000116909<br>TRCN00000116910<br>TRCN00000116908<br>TRCN00000200866<br>TRCN00000191572<br>TRCN00000201016 |
| 25 | BCOR  | TRCN0000033459<br>TRCN0000033460<br>TRCN0000033461<br>TRCN0000033462<br>TRCN0000033463                                                                                                                   |
| 26 | BMI1  | TRCN0000020154<br>TRCN0000020155<br>TRCN0000020156<br>TRCN0000020157<br>TRCN0000020158                                                                                                                   |
| 27 | BOP1  | TRCN0000078068<br>TRCN0000078069<br>TRCN0000078070                                                                                                                                                       |

|    |      |                                                                                                          |
|----|------|----------------------------------------------------------------------------------------------------------|
|    |      | TRCN0000078071<br>TRCN0000078072                                                                         |
| 28 | BPTF | TRCN0000016818<br>TRCN0000016819<br>TRCN0000016820<br>TRCN0000016821<br>TRCN0000016822                   |
| 29 | BRAF | TRCN0000006289<br>TRCN0000006290<br>TRCN0000006291<br>TRCN0000006292<br>TRCN0000006293                   |
| 30 | BRD1 | TRCN0000019284<br>TRCN0000019285<br>TRCN0000019286<br>TRCN0000019287<br>TRCN0000019288                   |
| 31 | BRD2 | TRCN0000006308<br>TRCN0000006309<br>TRCN0000006310<br>TRCN0000006311<br>TRCN0000006312                   |
| 32 | BRD3 | TRCN0000021374<br>TRCN0000021375<br>TRCN0000021376<br>TRCN0000021377<br>TRCN0000021378                   |
| 33 | BRD4 | TRCN0000021424<br>TRCN0000021425<br>TRCN0000021426<br>TRCN0000021427<br>TRCN0000021428                   |
| 34 | BRD7 | TRCN00000151378<br>TRCN00000151543<br>TRCN00000154102                                                    |
| 35 | BRD8 | TRCN0000019379<br>TRCN0000019380<br>TRCN0000019381<br>TRCN0000019382<br>TRCN0000019383<br>TRCN0000096646 |
| 36 | BRD9 | TRCN00000127634<br>TRCN00000127780<br>TRCN00000128333                                                    |

|    |                |                                                                                                                                                                |
|----|----------------|----------------------------------------------------------------------------------------------------------------------------------------------------------------|
|    |                | TRCN0000128610<br>TRCN0000131081                                                                                                                               |
| 37 | BRDT           | TRCN0000006303<br>TRCN0000006304<br>TRCN0000006305<br>TRCN0000006306<br>TRCN0000006307                                                                         |
| 38 | BRPF1          | TRCN0000021909<br>TRCN0000021912<br>TRCN0000021913<br>TRCN0000019287<br>TRCN0000021910<br>TRCN0000019286<br>TRCN0000019288<br>TRCN0000019285<br>TRCN0000019284 |
| 39 | BRPF3          | TRCN0000021101<br>TRCN0000021099<br>TRCN0000021102<br>TRCN0000021100<br>TRCN0000021103                                                                         |
| 40 | BRWD1          | TRCN0000062663<br>TRCN0000062667<br>TRCN0000062664<br>TRCN0000062665<br>TRCN0000062666<br>TRCN0000084534                                                       |
| 41 | BRWD3          | TRCN0000160865<br>TRCN0000159352<br>TRCN0000159686<br>TRCN0000136866<br>TRCN0000162485                                                                         |
| 42 | BTAF1          | TRCN0000013345<br>TRCN0000013347<br>TRCN0000013343<br>TRCN0000013346<br>TRCN0000013344                                                                         |
| 43 | C1ORF149/MEAF6 | TRCN0000130900<br>TRCN0000131146<br>TRCN0000131218<br>TRCN0000127694<br>TRCN0000128122                                                                         |
| 44 | C20orf20/MRGBP | TRCN0000158734<br>TRCN0000159338                                                                                                                               |

|    |       |                                                                                                                            |
|----|-------|----------------------------------------------------------------------------------------------------------------------------|
|    |       | TRCN0000159786<br>TRCN0000159916<br>TRCN0000159917                                                                         |
| 45 | CARM1 | TRCN0000007167<br>TRCN0000011071<br>TRCN0000007168<br>TRCN0000007169                                                       |
| 46 | CBX1  | TRCN0000062223<br>TRCN0000062224<br>TRCN0000062225<br>TRCN0000062227                                                       |
| 47 | CBX2  | TRCN0000020324<br>TRCN0000020325<br>TRCN0000020326<br>TRCN0000020327<br>TRCN0000020328                                     |
| 48 | CBX3  | TRCN0000021914<br>TRCN0000021915<br>TRCN0000021916<br>TRCN0000021917<br>TRCN0000021918                                     |
| 49 | CBX4  | TRCN0000010848<br>TRCN0000010847<br>TRCN0000010847<br>TRCN0000010848<br>TRCN0000004075<br>TRCN0000004076<br>TRCN0000004077 |
| 50 | CBX5  | TRCN0000062238<br>TRCN0000062239<br>TRCN0000062240<br>TRCN0000062241                                                       |
| 51 | CBX6  | TRCN0000019064<br>TRCN0000019065<br>TRCN0000019066<br>TRCN0000019067<br>TRCN0000019068<br>TRCN0000019066<br>TRCN0000019064 |
| 52 | CBX7  | TRCN0000019144<br>TRCN0000019145<br>TRCN0000019146<br>TRCN0000019147<br>TRCN0000019148                                     |

|    |        |                                                                                        |
|----|--------|----------------------------------------------------------------------------------------|
| 53 | CBX8   | TRCN0000021894<br>TRCN0000021895<br>TRCN0000021896<br>TRCN0000021897<br>TRCN0000021898 |
| 54 | CDYL   | TRCN0000127490<br>TRCN0000128090<br>TRCN0000129081<br>TRCN0000130319<br>TRCN0000130348 |
| 55 | CDYL2  | TRCN0000130613<br>TRCN0000130980<br>TRCN0000128562<br>TRCN0000129793<br>TRCN0000130929 |
| 56 | CHAF1A | TRCN0000074273<br>TRCN0000074274<br>TRCN0000074275<br>TRCN0000074276<br>TRCN0000074277 |
| 57 | CHAF1B | TRCN0000074278<br>TRCN0000074279<br>TRCN0000074280<br>TRCN0000074281<br>TRCN0000074282 |
| 58 | CHD1   | TRCN0000021309<br>TRCN0000021310<br>TRCN0000021311<br>TRCN0000021312<br>TRCN0000021313 |
| 59 | CHD1L  | TRCN0000013468<br>TRCN0000013469<br>TRCN0000013470<br>TRCN0000013471<br>TRCN0000013472 |
| 60 | CHD2   | TRCN0000021334<br>TRCN0000021335<br>TRCN0000021336<br>TRCN0000021337<br>TRCN0000021338 |
| 61 | CHD3   | TRCN0000107970<br>TRCN0000107971<br>TRCN0000107972<br>TRCN0000107973                   |

|    |        |                                                                                                                                                                                  |
|----|--------|----------------------------------------------------------------------------------------------------------------------------------------------------------------------------------|
|    |        | TRCN0000107974                                                                                                                                                                   |
| 62 | CHD4   | TRCN0000021359<br>TRCN0000021360<br>TRCN0000021361<br>TRCN0000021362<br>TRCN0000021363                                                                                           |
| 63 | CHD5   | TRCN0000021794<br>TRCN0000021795<br>TRCN0000021796<br>TRCN0000021797<br>TRCN0000021798<br>TRCN0000133708<br>TRCN0000134601<br>TRCN0000135744<br>TRCN0000136457<br>TRCN0000138817 |
| 64 | CHD6   | TRCN0000107415<br>TRCN0000107416<br>TRCN0000107417<br>TRCN0000107418<br>TRCN0000107419                                                                                           |
| 65 | CHD7   | TRCN0000016408<br>TRCN0000016409<br>TRCN0000016410<br>TRCN0000016411<br>TRCN0000016412                                                                                           |
| 66 | CHD8   | TRCN0000016508<br>TRCN0000016509<br>TRCN0000016510<br>TRCN0000016511<br>TRCN0000016512                                                                                           |
| 67 | CHD9   | TRCN0000108085<br>TRCN0000108086<br>TRCN0000108087<br>TRCN0000108088<br>TRCN0000108089                                                                                           |
| 68 | CHRAC1 | TRCN0000017398<br>TRCN0000017399<br>TRCN0000017400<br>TRCN0000017401<br>TRCN0000017402                                                                                           |
| 69 | CITED2 | TRCN0000015653<br>TRCN0000015654<br>TRCN0000015656                                                                                                                               |



|    |        |                                                                                                                                              |
|----|--------|----------------------------------------------------------------------------------------------------------------------------------------------|
|    |        | TRCN0000015657<br>TRCN0000015655<br>TRCN0000055104<br>TRCN0000055105<br>TRCN0000055107                                                       |
| 70 | CLOCK  | TRCN0000018974<br>TRCN0000018975<br>TRCN0000018976<br>TRCN0000018977<br>TRCN0000018978                                                       |
| 71 | CREBBP | TRCN0000006485<br>TRCN0000011027<br>TRCN0000006486<br>TRCN0000006487<br>TRCN0000006488                                                       |
| 72 | CTCF   | TRCN0000015653<br>TRCN0000015654<br>TRCN0000015656<br>TRCN0000015657<br>TRCN0000015655<br>TRCN0000055104<br>TRCN0000055105<br>TRCN0000055107 |
| 73 | CTNNB1 | TRCN0000003846<br>TRCN0000003843<br>TRCN0000003845<br>TRCN0000010824<br>TRCN0000003844                                                       |
| 74 | CTSL1  | TRCN0000003674<br>TRCN0000003675<br>TRCN0000003676<br>TRCN0000003677<br>TRCN0000003678                                                       |
| 75 | CXXC1  | TRCN0000155700<br>TRCN0000155371<br>TRCN0000152721<br>TRCN0000155409<br>TRCN0000156075                                                       |
| 76 | DMAP1  | TRCN0000021744<br>TRCN0000021745<br>TRCN0000021746<br>TRCN0000021747<br>TRCN0000021748                                                       |
| 77 | DNMT1  | TRCN0000021889                                                                                                                               |

|    |        |                                                                                                                            |
|----|--------|----------------------------------------------------------------------------------------------------------------------------|
|    |        | TRCN0000021890<br>TRCN0000021891<br>TRCN0000021892<br>TRCN0000021893                                                       |
| 78 | DNMT3A | TRCN0000035754<br>TRCN0000035755<br>TRCN0000035756<br>TRCN0000035757<br>TRCN0000035758                                     |
| 79 | DNMT3B | TRCN0000035687<br>TRCN0000035685<br>TRCN0000035684<br>TRCN0000035688<br>TRCN0000035686                                     |
| 80 | DNMT3L | TRCN0000019682<br>TRCN0000019683<br>TRCN0000019680<br>TRCN0000019679<br>TRCN0000019681                                     |
| 81 | DOT1L  | TRCN0000020211<br>TRCN0000020212<br>TRCN0000020209<br>TRCN0000020210<br>TRCN0000020211<br>TRCN0000020212<br>TRCN0000020213 |
| 82 | DPF1   | TRCN0000013168<br>TRCN0000013169<br>TRCN0000013170<br>TRCN0000013171<br>TRCN0000013172                                     |
| 83 | DPF2   | TRCN0000014743<br>TRCN0000014744<br>TRCN0000014745<br>TRCN0000014746<br>TRCN0000014747                                     |
| 84 | DPF3   | TRCN0000013153<br>TRCN0000013154<br>TRCN0000013155<br>TRCN0000013156<br>TRCN0000013157<br>TRCN0000086345                   |
| 85 | DZIP3  | TRCN0000034244<br>TRCN0000034246                                                                                           |

|    |       |                                                                                                                                              |
|----|-------|----------------------------------------------------------------------------------------------------------------------------------------------|
|    |       | TRCN0000034245<br>TRCN0000034247<br>TRCN0000034248                                                                                           |
| 86 | EDF1  | TRCN0000013273<br>TRCN0000013274<br>TRCN0000013275<br>TRCN0000013276<br>TRCN0000013277                                                       |
| 87 | EED   | TRCN0000021204<br>TRCN0000021205<br>TRCN0000021206<br>TRCN0000021207<br>TRCN0000021208<br>TRCN0000095721<br>TRCN0000095723                   |
| 88 | EHMT1 | TRCN0000036054<br>TRCN0000036055<br>TRCN0000036056<br>TRCN0000036057<br>TRCN0000036058                                                       |
| 89 | EHMT2 | TRCN0000115667<br>TRCN0000115668<br>TRCN0000115669<br>TRCN0000115670<br>TRCN0000115671                                                       |
| 90 | ELP3  | TRCN0000001277<br>TRCN0000001278<br>TRCN0000001279<br>TRCN0000001280<br>TRCN0000001281                                                       |
| 91 | EP300 | TRCN0000039883<br>TRCN0000039884<br>TRCN0000039885<br>TRCN0000039886<br>TRCN0000039887                                                       |
| 92 | EP400 | TRCN0000148232<br>TRCN0000149814<br>TRCN0000148814<br>TRCN0000149151<br>TRCN0000050261<br>TRCN0000050258<br>TRCN0000050260<br>TRCN0000050262 |
| 93 | EPC1  | TRCN0000073263                                                                                                                               |

|     |        |                                                                                        |
|-----|--------|----------------------------------------------------------------------------------------|
|     |        | TRCN0000073264<br>TRCN0000073265<br>TRCN0000073266<br>TRCN0000073267<br>TRCN0000108956 |
| 94  | EPC2   | TRCN0000062733<br>TRCN0000062734<br>TRCN0000062735<br>TRCN0000062736<br>TRCN0000062737 |
| 95  | EVI1   | TRCN0000002528<br>TRCN0000002529<br>TRCN0000002530<br>TRCN0000002531<br>TRCN0000002532 |
| 96  | EZH1   | TRCN0000002439<br>TRCN0000010708<br>TRCN0000002440<br>TRCN0000002441<br>TRCN0000002442 |
| 97  | EZH2   | TRCN0000040073<br>TRCN0000040074<br>TRCN0000040075<br>TRCN0000040076<br>TRCN0000040077 |
| 98  | FBXL10 | TRCN0000118437<br>TRCN0000118438<br>TRCN0000118439<br>TRCN0000118440<br>TRCN0000118441 |
| 99  | FBXL11 | TRCN0000021999<br>TRCN0000022000<br>TRCN0000022001<br>TRCN0000022002<br>TRCN0000022003 |
| 100 | FBXL19 | TRCN0000062333<br>TRCN0000062334<br>TRCN0000062335<br>TRCN0000062336<br>TRCN0000062337 |
| 101 | FKBP1A | TRCN0000005949<br>TRCN0000005950<br>TRCN0000005951<br>TRCN0000005952                   |

|     |              |                                                                                                                                                                                  |
|-----|--------------|----------------------------------------------------------------------------------------------------------------------------------------------------------------------------------|
|     |              | TRCN0000005953                                                                                                                                                                   |
| 102 | FKBP5        | TRCN0000000234<br>TRCN0000000235<br>TRCN0000000236<br>TRCN0000000237<br>TRCN0000000238                                                                                           |
| 103 | GCN5L2/KAT2A | TRCN0000038879<br>TRCN0000038880<br>TRCN0000038881<br>TRCN0000038882<br>TRCN0000038883                                                                                           |
| 104 | GON4L        | TRCN0000133702<br>TRCN0000134438<br>TRCN0000133891                                                                                                                               |
| 105 | GTF3C4       | TRCN0000013398<br>TRCN0000013399<br>TRCN0000013400<br>TRCN0000013401<br>TRCN0000013402                                                                                           |
| 106 | H2AFB1       | TRCN0000106825<br>TRCN0000106827<br>TRCN0000106829<br>TRCN0000106895<br>TRCN0000106896<br>TRCN0000106898<br>TRCN0000106899<br>TRCN0000106826<br>TRCN0000106828<br>TRCN0000106897 |
| 107 | H2AFJ        | TRCN0000106746<br>TRCN0000106749<br>RCN0000106745<br>TRCN0000106747<br>TRCN0000106748                                                                                            |
| 108 | H2AFV        | TRCN0000106835<br>TRCN0000106837<br>TRCN0000106838<br>TRCN0000106839<br>TRCN0000106836<br>TRCN0000073848                                                                         |
| 109 | H2AFY        | TRCN0000106691<br>TRCN0000106694<br>TRCN0000106690<br>TRCN0000106692                                                                                                             |

|     |        |                                                                                                                            |
|-----|--------|----------------------------------------------------------------------------------------------------------------------------|
|     |        | TRCN0000106693<br>TRCN0000097039                                                                                           |
| 110 | H2AFY3 | TRCN0000096926                                                                                                             |
| 111 | H2AFZ  | TRCN0000072583<br>TRCN0000072584<br>TRCN0000072585<br>TRCN0000072586<br>TRCN0000072587                                     |
| 112 | H2BFM  | TRCN0000015523<br>TRCN0000015524<br>TRCN0000015526<br>TRCN0000015527<br>TRCN0000139134<br>TRCN0000141476<br>TRCN0000015525 |
| 113 | HAT1   | TRCN0000034734<br>TRCN0000034735<br>TRCN0000034736<br>TRCN0000034737<br>TRCN0000034738                                     |
| 114 | HCFC1  | TRCN0000016263<br>TRCN0000016264<br>TRCN0000016265<br>TRCN0000016266<br>TRCN0000016267                                     |
| 115 | HDAC1  | TRCN0000004814<br>TRCN0000004815<br>TRCN0000004816<br>TRCN0000004817<br>TRCN0000004818                                     |
| 116 | HDAC10 | TRCN0000004859<br>TRCN0000004860<br>TRCN0000004861<br>TRCN0000004862<br>TRCN0000004863                                     |
| 117 | HDAC11 | TRCN0000017753<br>TRCN0000017754<br>TRCN0000017755<br>TRCN0000017756<br>TRCN0000017757                                     |
| 118 | HDAC2  | TRCN0000004819<br>TRCN0000004820<br>TRCN0000004821<br>TRCN0000004822                                                       |

|     |       |                                                                                        |
|-----|-------|----------------------------------------------------------------------------------------|
|     |       | TRCN0000004823                                                                         |
| 119 | HDAC3 | TRCN0000004824<br>TRCN0000004825<br>TRCN0000004826<br>TRCN0000004827<br>TRCN0000004828 |
| 120 | HDAC4 | TRCN0000004829<br>TRCN0000004830<br>TRCN0000004831<br>TRCN0000004832<br>TRCN0000004833 |
| 121 | HDAC5 | TRCN0000004834<br>TRCN0000004835<br>TRCN0000004836<br>TRCN0000004837<br>TRCN0000004838 |
| 122 | HDAC6 | TRCN0000004839<br>TRCN0000004840<br>TRCN0000004841<br>TRCN0000004842<br>TRCN0000004843 |
| 123 | HDAC7 | TRCN0000004844<br>TRCN0000004845<br>TRCN0000004846<br>TRCN0000004847<br>TRCN0000004848 |
| 124 | HDAC8 | TRCN0000004849<br>TRCN0000004850<br>TRCN0000004851<br>TRCN0000004852<br>TRCN0000004853 |
| 125 | HDAC9 | TRCN0000004854<br>TRCN0000004855<br>TRCN0000004856<br>TRCN0000004857<br>TRCN0000004858 |
| 126 | HELLS | TRCN0000000306<br>TRCN0000000307<br>TRCN0000000308<br>TRCN0000000309<br>TRCN0000000310 |
| 127 | HILS1 | TRCN0000106970<br>TRCN0000106971<br>TRCN0000106972                                     |

|     |        |                                                                                                                            |
|-----|--------|----------------------------------------------------------------------------------------------------------------------------|
|     |        | TRCN0000106973<br>TRCN0000106974                                                                                           |
| 128 | HIRA   | TRCN0000020516<br>TRCN0000020515<br>TRCN0000020514<br>TRCN0000020515<br>TRCN0000020516<br>TRCN0000020517<br>TRCN0000020518 |
| 129 | HLTF   | TRCN0000003971<br>TRCN0000003972<br>TRCN0000003973<br>TRCN0000010836<br>TRCN0000003974                                     |
| 130 | HMG20B | TRCN0000015500<br>TRCN0000015499<br>TRCN0000015498<br>TRCN0000015501                                                       |
| 131 | HMGA1  | TRCN0000004909<br>TRCN0000018953<br>TRCN0000018950<br>TRCN0000018951<br>TRCN0000018949<br>TRCN0000018952                   |
| 132 | HMGA2  | TRCN0000021964<br>TRCN0000021967<br>TRCN0000021968<br>TRCN0000021965<br>TRCN00000126047<br>TRCN0000021966                  |
| 133 | HMGB1  | TRCN0000018930<br>TRCN0000018932<br>TRCN0000018934<br>TRCN0000092693<br>TRCN0000018933<br>TRCN0000063714<br>TRCN0000018931 |
| 134 | HMGB2  | TRCN0000019009<br>TRCN0000019010<br>TRCN0000019013<br>TRCN0000019012<br>TRCN0000019011<br>TRCN0000092929<br>TRCN0000092932 |



|     |             |                                                                                                                                                 |
|-----|-------------|-------------------------------------------------------------------------------------------------------------------------------------------------|
|     |             | TRCN0000092942                                                                                                                                  |
| 135 | HMGB3       | TRCN0000018518<br>TRCN0000018519<br>TRCN0000018520<br>TRCN0000071432<br>TRCN0000016705                                                          |
| 136 | HMG1        | TRCN0000019059<br>TRCN0000019060<br>TRCN0000019061<br>TRCN0000019062<br>TRCN0000019063                                                          |
| 137 | HMG2        | TRCN0000018551<br>TRCN0000018549<br>TRCN00000127823<br>TRCN0000018552<br>TRCN00000108988<br>TRCN00000130247<br>TRCN0000018548<br>TRCN0000018550 |
| 138 | HMG3        | TRCN0000019105<br>TRCN0000019104<br>TRCN0000019108<br>TRCN0000019106<br>TRCN0000019107                                                          |
| 139 | HTATIP/KAT5 | TRCN0000020314<br>TRCN0000020315<br>TRCN0000020316<br>TRCN0000020317<br>TRCN0000020318                                                          |
| 140 | ING1        | TRCN0000073268<br>TRCN0000073269<br>TRCN0000073270<br>TRCN0000073271<br>TRCN0000073272                                                          |
| 141 | ING2        | TRCN0000019214<br>TRCN0000019215<br>TRCN0000019216<br>TRCN0000019217<br>TRCN0000019218                                                          |
| 142 | ING3        | TRCN0000073273<br>TRCN0000073277<br>TRCN0000073274<br>TRCN0000073275<br>TRCN0000073276                                                          |

|     |         |                                                                                                          |
|-----|---------|----------------------------------------------------------------------------------------------------------|
| 143 | ING4    | TRCN0000128673<br>TRCN0000129127<br>TRCN0000129334<br>TRCN0000129395<br>TRCN0000131049<br>TRCN0000103947 |
| 144 | ING5    | TRCN0000020089<br>TRCN0000020091<br>TRCN0000020090<br>TRCN0000020092<br>TRCN0000020093                   |
| 145 | INOC1   | TRCN0000107555<br>TRCN0000107556<br>TRCN0000107557<br>TRCN0000107558<br>TRCN0000107559                   |
| 146 | JARID1A | TRCN0000014628<br>TRCN0000014629<br>TRCN0000014630<br>TRCN0000014631<br>TRCN0000014632                   |
| 147 | JARID1B | TRCN0000014758<br>TRCN0000014759<br>TRCN0000014760<br>TRCN0000014761<br>TRCN0000014762                   |
| 148 | JARID1C | TRCN0000022084<br>TRCN0000022085<br>TRCN0000022084<br>TRCN0000022085<br>TRCN0000022087<br>TRCN0000022088 |
| 149 | JARID1D | TRCN0000022114<br>TRCN0000022115<br>TRCN0000022116<br>TRCN0000022117<br>TRCN0000022118                   |
| 150 | JARID2  | TRCN0000107365<br>TRCN0000107366<br>TRCN0000107367<br>TRCN0000107368<br>TRCN0000107369                   |
| 151 | JMJD1A  | TRCN0000021149<br>TRCN0000021150                                                                         |

|     |             |                                                                                        |
|-----|-------------|----------------------------------------------------------------------------------------|
|     |             | TRCN0000021151<br>TRCN0000021152<br>TRCN0000021153                                     |
| 152 | JMJD1B      | TRCN0000017093<br>TRCN0000017094<br>TRCN0000017095<br>TRCN0000017096<br>TRCN0000017097 |
| 153 | JMJD1C      | TRCN0000107560<br>TRCN0000107561<br>TRCN0000107562<br>TRCN0000107563<br>TRCN0000107564 |
| 154 | JMJD2A      | TRCN0000013493<br>TRCN0000013494<br>TRCN0000013495<br>TRCN0000013496<br>TRCN0000013497 |
| 155 | JMJD2B      | TRCN0000018013<br>TRCN0000018014<br>TRCN0000018015<br>TRCN0000018016<br>TRCN0000018017 |
| 156 | JMJD2C      | TRCN0000022054<br>TRCN0000022055<br>TRCN0000022056<br>TRCN0000022057<br>TRCN0000022058 |
| 157 | JMJD2D      | TRCN0000149641<br>TRCN0000149414<br>TRCN0000147186<br>TRCN0000148837<br>TRCN0000148192 |
| 158 | JMJD3/KDM6B | TRCN0000095268                                                                         |
| 159 | JMJD4       | TRCN0000138244<br>TRCN0000138555<br>TRCN0000138689<br>TRCN0000137919<br>TRCN0000138740 |
| 160 | JMJD5       | TRCN0000129536<br>TRCN0000128906<br>TRCN0000130971<br>TRCN0000130438<br>TRCN0000130552 |

|     |         |                                                                                                                                                                     |
|-----|---------|---------------------------------------------------------------------------------------------------------------------------------------------------------------------|
| 161 | JMJD6   | TRCN0000063338<br>TRCN0000063339<br>TRCN0000063340<br>TRCN0000063341<br>TRCN0000063342                                                                              |
| 162 | L3MBTL  | TRCN0000016863<br>TRCN0000016864<br>TRCN0000016865<br>TRCN0000016866<br>TRCN0000016867                                                                              |
| 163 | L3MBTL2 | TRCN0000021725<br>TRCN0000021728<br>TRCN0000021726<br>TRCN0000021727<br>TRCN0000021724                                                                              |
| 164 | MBD1    | TRCN0000015428<br>TRCN0000015429<br>TRCN0000015430<br>TRCN0000015431<br>TRCN0000015432                                                                              |
| 165 | MBD2    | TRCN0000013318<br>TRCN0000013319<br>TRCN0000013320<br>TRCN0000013321<br>TRCN0000013322                                                                              |
| 166 | MBD3    | TRCN0000017353<br>TRCN0000017354<br>TRCN0000017355<br>TRCN0000017356<br>TRCN0000017357                                                                              |
| 167 | MBD4    | TRCN0000013313<br>TRCN0000013314<br>TRCN0000013315<br>TRCN0000013316<br>TRCN0000013317                                                                              |
| 168 | MBTD1   | TRCN00000153466<br>TRCN00000152974<br>TRCN00000151070<br>TRCN00000150313<br>TRCN00000154234<br>TRCN0000078113<br>TRCN0000073848<br>TRCN0000097657<br>TRCN0000097655 |

|     |        |                                                                                                                            |
|-----|--------|----------------------------------------------------------------------------------------------------------------------------|
| 169 | MDC1   | TRCN0000018850<br>TRCN0000018851<br>TRCN0000018852<br>TRCN0000018853<br>TRCN0000018854                                     |
| 170 | MDS1   | TRCN0000015583<br>TRCN0000015584<br>TRCN0000015585<br>TRCN0000015586<br>TRCN0000015587                                     |
| 171 | MECP2  | TRCN0000021239<br>TRCN0000021240<br>TRCN0000021241<br>TRCN0000021242<br>TRCN0000021243                                     |
| 172 | MEN1   | TRCN0000040138<br>TRCN0000040139<br>TRCN0000040140<br>TRCN0000040141<br>TRCN0000040142                                     |
| 173 | METTL8 | TRCN0000007228                                                                                                             |
| 174 | MGMT   | TRCN0000022364<br>TRCN0000022365<br>TRCN0000022366<br>TRCN0000022367<br>TRCN0000022368                                     |
| 175 | MIER1  | TRCN0000108032<br>TRCN0000108030<br>TRCN0000108031<br>TRCN0000108033<br>TRCN0000108034<br>TRCN0000095734<br>TRCN0000095737 |
| 176 | MIER2  | TRCN0000137269<br>TRCN0000138895<br>TRCN0000138939<br>TRCN0000137227<br>TRCN0000137705                                     |
| 177 | MIER3  | TRCN0000127638<br>TRCN0000130779<br>TRCN0000129622<br>TRCN0000128394<br>TRCN0000129860                                     |
| 178 | MLL1   | TRCN0000108069                                                                                                             |

|     |           |                                                                                                          |
|-----|-----------|----------------------------------------------------------------------------------------------------------|
| 179 | MLL3      | TRCN0000008742<br>TRCN0000008743<br>TRCN0000008744<br>TRCN0000008745<br>TRCN0000008746<br>TRCN0000008746 |
| 180 | MLL4      | TRCN0000005958<br>TRCN0000005959<br>TRCN0000005960<br>TRCN0000005961<br>TRCN0000005962                   |
| 181 | MLL4/WBP7 | TRCN0000005958<br>TRCN0000005959<br>TRCN0000005960<br>TRCN0000005961<br>TRCN0000005962                   |
| 182 | MLL5      | TRCN0000150550<br>TRCN0000154711<br>TRCN0000155824<br>TRCN0000157609<br>TRCN0000158279                   |
| 183 | MLLT6     | TRCN0000019902<br>TRCN0000019899<br>TRCN0000019901<br>TRCN0000019903<br>TRCN0000019900<br>TRCN0000074123 |
| 184 | MORF4L1   | TRCN0000107580<br>TRCN0000107581<br>TRCN0000107582<br>TRCN0000107583<br>TRCN0000107584<br>TRCN0000015007 |
| 185 | MORF4L2   | TRCN0000107309<br>TRCN0000107307<br>TRCN0000107305<br>TRCN0000107306<br>TRCN0000107308<br>TRCN0000095666 |
| 186 | MPHOSPH8  | TRCN0000117922<br>TRCN0000117925<br>TRCN0000117923<br>TRCN0000117926<br>TRCN0000117924                   |

|     |             |                                                                                                                            |
|-----|-------------|----------------------------------------------------------------------------------------------------------------------------|
|     |             | TRCN0000085440                                                                                                             |
| 187 | MSL3L1/MSL3 | TRCN0000022104<br>TRCN0000022105<br>TRCN0000022106<br>TRCN0000022107<br>TRCN0000022108                                     |
| 188 | MTA1        | TRCN0000013358<br>TRCN0000013359<br>TRCN0000013360<br>TRCN0000013361<br>TRCN0000013362                                     |
| 189 | MTA2        | TRCN0000013373<br>TRCN0000013374<br>TRCN0000013375<br>TRCN0000013376<br>TRCN0000013377                                     |
| 190 | MTA3        | TRCN0000016458<br>TRCN0000016459<br>TRCN0000016460<br>TRCN0000016461<br>TRCN0000016462                                     |
| 191 | MTF2        | TRCN0000107680<br>TRCN0000107681<br>TRCN0000107682<br>TRCN0000107683<br>TRCN0000107684<br>TRCN0000086133<br>TRCN0000086137 |
| 192 | MYST1       | TRCN0000034875<br>TRCN0000034876<br>TRCN0000034877<br>TRCN0000034878                                                       |
| 193 | MYST2       | TRCN0000021629<br>TRCN0000021630<br>TRCN0000021631<br>TRCN0000021632<br>TRCN0000021633                                     |
| 194 | MYST3       | TRCN0000013123<br>TRCN0000013124<br>TRCN0000013125<br>TRCN0000013126                                                       |
| 195 | MYST4       | TRCN0000019359<br>TRCN0000019360<br>TRCN0000019361                                                                         |

|     |        |                                                                                                          |
|-----|--------|----------------------------------------------------------------------------------------------------------|
|     |        | TRCN0000019362<br>TRCN0000019363                                                                         |
| 196 | N6AMT1 | TRCN0000038755<br>TRCN0000038758<br>TRCN0000038754<br>TRCN0000038757<br>TRCN0000038756                   |
| 197 | N6AMT2 | TRCN0000139966<br>TRCN0000122732<br>TRCN0000140564<br>TRCN0000122562<br>TRCN0000145142                   |
| 198 | NAP1I1 | TRCN0000149610<br>TRCN0000149872<br>TRCN0000148741<br>TRCN0000149921<br>TRCN0000155836<br>TRCN0000092890 |
| 199 | NAP1L2 | TRCN0000147762<br>TRCN0000146531<br>TRCN0000146873<br>TRCN0000148173<br>TRCN0000147038                   |
| 200 | NAP1L3 | TRCN0000149156<br>TRCN0000147100<br>TRCN0000149498<br>TRCN0000147275<br>TRCN0000149864                   |
| 201 | NAP1L4 | TRCN0000151475<br>TRCN0000154499<br>TRCN0000155016<br>TRCN0000151026<br>TRCN0000156041                   |
| 202 | NCOA1  | TRCN0000004082<br>TRCN0000004080<br>TRCN0000004078<br>TRCN0000004079<br>TRCN0000095569<br>TRCN0000004081 |
| 203 | NCOA3  | TRCN0000019699<br>TRCN0000019700<br>TRCN0000019701<br>TRCN0000019702<br>TRCN0000019703                   |



|     |       |                                                                                                                            |
|-----|-------|----------------------------------------------------------------------------------------------------------------------------|
| 204 | NCOA6 | TRCN0000063267<br>TRCN0000063264<br>TRCN0000063266<br>TRCN0000063263<br>TRCN0000063265<br>TRCN0000176319                   |
| 205 | NCOR1 | TRCN0000060654<br>TRCN0000060657<br>TRCN0000060656<br>TRCN0000060653<br>TRCN0000060655                                     |
| 206 | NCOR2 | TRCN0000060704<br>TRCN0000060706<br>TRCN0000060703<br>TRCN0000060707<br>TRCN0000060705<br>TRCN0000063970<br>TRCN0000095279 |
| 207 | NR0B2 | TRCN0000033649<br>TRCN0000033650<br>TRCN0000033651<br>TRCN0000033652<br>TRCN0000033653                                     |
| 208 | NSD1  | TRCN0000061353<br>TRCN0000061354<br>TRCN0000061356<br>TRCN0000061357                                                       |
| 209 | PADI4 | TRCN0000051678<br>TRCN0000051679<br>TRCN0000051680<br>TRCN0000051681                                                       |
| 210 | PARP1 | TRCN0000007928<br>TRCN0000007929<br>TRCN0000007930<br>TRCN0000007931<br>TRCN0000007932                                     |
| 211 | PARP2 | TRCN0000007933<br>TRCN0000007934<br>TRCN0000007935<br>TRCN0000007936<br>TRCN0000007937                                     |
| 212 | PAX5  | TRCN0000016058<br>TRCN0000016059<br>TRCN0000016060                                                                         |

|     |            |                                                                                                                            |
|-----|------------|----------------------------------------------------------------------------------------------------------------------------|
|     |            | TRCN0000016061<br>TRCN0000016062                                                                                           |
| 213 | PAXIP1     | TRCN0000128479<br>TRCN0000150101<br>TRCN0000147957<br>TRCN0000147635<br>TRCN0000129174                                     |
| 214 | PBRM1      | TRCN0000015995<br>TRCN0000015994<br>TRCN0000015993<br>TRCN0000015997<br>TRCN0000007228                                     |
| 215 | PCAF/KAT2B | TRCN0000018528<br>TRCN0000018529<br>TRCN0000018530<br>TRCN0000018531<br>TRCN0000018532                                     |
| 216 | PCGF1      | TRCN0000073131<br>TRCN0000073128<br>TRCN0000073129<br>TRCN0000073130<br>TRCN0000073132                                     |
| 217 | PCGF2      | TRCN0000022029<br>TRCN0000022030<br>TRCN0000022031<br>TRCN0000022032<br>TRCN0000022033                                     |
| 218 | PCGF3      | TRCN0000095494                                                                                                             |
| 219 | PCGF5      | TRCN0000073113<br>TRCN0000073115<br>TRCN0000073117<br>TRCN0000073116<br>TRCN0000140719<br>TRCN0000095162<br>TRCN0000073114 |
| 220 | PCGF6      | TRCN0000073108<br>TRCN0000073109<br>TRCN0000073112<br>TRCN0000073110<br>TRCN0000073111<br>TRCN0000095301                   |
| 221 | PCMT1      | TRCN0000036399<br>TRCN0000036400<br>TRCN0000036401                                                                         |

|     |       |                                                                                                                                              |
|-----|-------|----------------------------------------------------------------------------------------------------------------------------------------------|
|     |       | TRCN0000036402<br>TRCN0000036403                                                                                                             |
| 222 | PCNA  | TRCN0000003861<br>TRCN0000003862<br>TRCN0000003863<br>TRCN0000003864<br>TRCN0000010826                                                       |
| 223 | PHF1  | TRCN0000019184<br>TRCN0000019185<br>TRCN0000019186<br>TRCN0000019187<br>TRCN0000019188                                                       |
| 224 | PHF11 | TRCN0000020112<br>TRCN0000020110<br>TRCN0000020111<br>TRCN0000020113<br>TRCN0000020109<br>TRCN0000073848                                     |
| 225 | PHF12 | TRCN0000015705<br>TRCN0000015706<br>TRCN0000015707<br>TRCN0000015704<br>TRCN0000015703<br>TRCN0000007228<br>TRCN0000084422<br>TRCN0000084419 |
| 226 | PHF13 | TRCN0000019637<br>TRCN0000019635<br>TRCN0000019634<br>TRCN0000019636<br>TRCN0000019638                                                       |
| 227 | PHF14 | TRCN0000019310<br>TRCN0000019309<br>TRCN0000019311<br>TRCN0000019312<br>TRCN0000019313                                                       |
| 228 | PHF15 | TRCN0000018515<br>TRCN0000018516<br>TRCN0000018513<br>TRCN0000018517<br>TRCN0000018514                                                       |
| 229 | PHF16 | TRCN0000019554<br>TRCN0000019555<br>TRCN0000019556                                                                                           |

|     |        |                                                                                                           |
|-----|--------|-----------------------------------------------------------------------------------------------------------|
|     |        | TRCN0000019558<br>TRCN0000019557                                                                          |
| 230 | PHF17  | TRCN0000019621<br>TRCN0000019619<br>TRCN0000019620<br>TRCN0000019622<br>TRCN0000019623                    |
| 231 | PHF19  | TRCN00000108185<br>TRCN00000108188<br>TRCN00000108189<br>TRCN00000108187<br>TRCN00000108186               |
| 232 | PHF20  | TRCN0000016316<br>TRCN0000016313<br>TRCN0000016317<br>TRCN0000016314<br>TRCN0000016315                    |
| 233 | PHF21A | TRCN0000037003<br>TRCN0000037000<br>TRCN0000036999<br>TRCN0000037001<br>TRCN0000037002<br>TRCN00000124326 |
| 234 | PHF23  | TRCN0000019259<br>TRCN0000019263<br>TRCN0000019261<br>TRCN0000019262<br>TRCN0000019260                    |
| 235 | PHF3   | TRCN0000019114<br>TRCN0000019115<br>TRCN0000019116<br>TRCN0000019117<br>TRCN0000019118                    |
| 236 | PHF8   | TRCN00000118317<br>TRCN00000118318<br>TRCN00000118319<br>TRCN00000118320<br>TRCN00000118321               |
| 237 | PML    | TRCN0000003866<br>TRCN0000003867<br>TRCN0000003868<br>TRCN0000003869                                      |
| 238 | POLR2B | TRCN0000021314<br>TRCN0000021315                                                                          |

|     |          |                                                                                        |
|-----|----------|----------------------------------------------------------------------------------------|
|     |          | TRCN0000021316<br>TRCN0000021317<br>TRCN0000021318                                     |
| 239 | PPARGC1A | TRCN0000001165<br>TRCN0000001166<br>TRCN0000001167<br>TRCN0000001168<br>TRCN0000001169 |
| 240 | PRDM1    | TRCN0000013608<br>TRCN0000013609<br>TRCN0000013610<br>TRCN0000013611<br>TRCN0000013612 |
| 241 | PRDM10   | TRCN0000016843<br>TRCN0000016844<br>TRCN0000016845<br>TRCN0000016846<br>TRCN0000016847 |
| 242 | PRDM11   | TRCN0000016888<br>TRCN0000016889<br>TRCN0000016890<br>TRCN0000016891<br>TRCN0000016892 |
| 243 | PRDM12   | TRCN0000017948<br>TRCN0000017949<br>TRCN0000017950<br>TRCN0000017951<br>TRCN0000017952 |
| 244 | PRDM13   | TRCN0000018003<br>TRCN0000018004<br>TRCN0000018005<br>TRCN0000018006<br>TRCN0000018007 |
| 245 | PRDM14   | TRCN0000018523<br>TRCN0000018524<br>TRCN0000018525<br>TRCN0000018526<br>TRCN0000018527 |
| 246 | PRDM16   | TRCN0000020044<br>TRCN0000020045<br>TRCN0000020046<br>TRCN0000020047<br>TRCN0000020048 |
| 247 | PRDM2    | TRCN0000013098                                                                         |

|     |        |                                                                                        |
|-----|--------|----------------------------------------------------------------------------------------|
|     |        | TRCN0000013099<br>TRCN0000013100<br>TRCN0000013101<br>TRCN0000013102                   |
| 248 | PRDM4  | TRCN0000015333<br>TRCN0000015334<br>TRCN0000015335<br>TRCN0000015336<br>TRCN0000015337 |
| 249 | PRDM5  | TRCN0000015258<br>TRCN0000015259<br>TRCN0000015260<br>TRCN0000015261<br>TRCN0000015262 |
| 250 | PRDM8  | TRCN0000016758<br>TRCN0000016759<br>TRCN0000016760<br>TRCN0000016761<br>TRCN0000016762 |
| 251 | PRDM9  | TRCN0000016803<br>TRCN0000016804<br>TRCN0000016805<br>TRCN0000016806<br>TRCN0000016807 |
| 252 | PRKAA1 | TRCN0000000857<br>TRCN0000000858<br>TRCN0000000859<br>TRCN0000000860<br>TRCN0000000861 |
| 253 | PRKAA2 | TRCN0000002168<br>TRCN0000002169<br>TRCN0000002170<br>TRCN0000002171<br>TRCN0000002172 |
| 254 | PRKCD  | TRCN0000010202<br>TRCN0000010193<br>TRCN0000010194<br>TRCN0000010203                   |
| 255 | PRMT1  | TRCN0000035929<br>TRCN0000035930<br>TRCN0000035931<br>TRCN0000035932<br>TRCN0000035933 |
| 256 | PRMT2  | TRCN0000035894                                                                         |

|     |       |                                                                                        |
|-----|-------|----------------------------------------------------------------------------------------|
|     |       | TRCN0000035895<br>TRCN0000035896<br>TRCN0000035897<br>TRCN0000035898                   |
| 257 | PRMT3 | TRCN0000034569<br>TRCN0000034570<br>TRCN0000034571<br>TRCN0000034572<br>TRCN0000034573 |
| 258 | PRMT5 | TRCN0000107085<br>TRCN0000107088<br>TRCN0000107087<br>TRCN0000107089<br>TRCN0000107086 |
| 259 | PRMT6 | TRCN0000034684<br>TRCN0000034685<br>TRCN0000034686<br>TRCN0000034687<br>TRCN0000034688 |
| 260 | PRMT7 | TRCN0000035149<br>TRCN0000035150<br>TRCN0000035151<br>TRCN0000035152<br>TRCN0000035153 |
| 261 | PRMT8 | TRCN0000034749<br>TRCN0000034750<br>TRCN0000034751<br>TRCN0000034752<br>TRCN0000034753 |
| 262 | PSIP1 | TRCN0000074818<br>TRCN0000074819<br>TRCN0000074820<br>TRCN0000074821<br>TRCN0000074822 |
| 263 | PYGO1 | TRCN0000129967<br>TRCN0000148786<br>TRCN0000149986<br>TRCN0000128133<br>TRCN0000130684 |
| 264 | PYGO2 | TRCN0000021861<br>TRCN0000021862<br>TRCN0000021863<br>TRCN0000021860<br>TRCN0000021859 |

|     |       |                                                                                                          |
|-----|-------|----------------------------------------------------------------------------------------------------------|
| 265 | RAG2  | TRCN0000051228<br>TRCN0000051229<br>TRCN0000051230<br>TRCN0000051231<br>TRCN0000051232                   |
| 266 | RBBP4 | TRCN0000115870<br>TRCN0000115867<br>RCN0000115868<br>TRCN0000115869<br>TRCN0000115871                    |
| 267 | RBBP5 | TRCN0000034410<br>TRCN0000034413                                                                         |
| 268 | RBBP7 | TRCN0000038888<br>TRCN0000038887<br>TRCN0000038884<br>TRCN0000038886<br>TRCN0000038885                   |
| 269 | RCOR1 | TRCN0000128570<br>TRCN0000129660<br>TRCN0000147184<br>TRCN0000128260<br>TRCN0000147902                   |
| 270 | RCOR2 | TRCN0000143126<br>TRCN0000140491<br>TRCN0000140769<br>TRCN0000140462                                     |
| 271 | RCOR3 | TRCN0000116087<br>TRCN0000116089<br>TRCN0000116090<br>TRCN0000116091<br>TRCN0000116088<br>TRCN0000126692 |
| 272 | RERE  | TRCN0000013578<br>TRCN0000013579<br>TRCN0000013580<br>TRCN0000013581<br>TRCN0000013582                   |
| 273 | RING1 | TRCN0000021989<br>TRCN0000021990<br>TRCN0000021991<br>TRCN0000021992<br>TRCN0000021993                   |
| 274 | RNF2  | TRCN0000033694<br>TRCN0000033695                                                                         |



|     |        |                                                                                                          |
|-----|--------|----------------------------------------------------------------------------------------------------------|
|     |        | TRCN0000033696<br>TRCN0000033697<br>TRCN0000033698                                                       |
| 275 | RNF20  | TRCN0000033874<br>TRCN0000033875<br>TRCN0000033876<br>TRCN0000033877<br>TRCN0000033878                   |
| 276 | RNF40  | TRCN0000004784<br>TRCN0000004780<br>TRCN0000004782<br>TRCN0000004781<br>TRCN0000004783                   |
| 277 | RNF6   | TRCN0000033699<br>TRCN0000033700<br>TRCN0000033701<br>TRCN0000033702<br>TRCN0000033703                   |
| 278 | RPA1   | TRCN0000010985<br>TRCN0000005984<br>TRCN0000010982<br>TRCN0000010983<br>TRCN0000005985                   |
| 279 | RPA3   | TRCN0000018860<br>TRCN0000018861<br>TRCN0000018862<br>TRCN0000018863<br>TRCN0000018864                   |
| 280 | RSF1   | TRCN0000128361<br>TRCN0000128484<br>TRCN0000128604<br>TRCN0000148481                                     |
| 281 | RUVBL1 | TRCN0000018914<br>TRCN0000018912<br>TRCN0000018913<br>TRCN0000018910<br>TRCN0000018911<br>TRCN0000115241 |
| 282 | RUVBL2 | TRCN0000051564<br>TRCN0000051567<br>TRCN0000051565<br>TRCN0000051563<br>TRCN0000051566                   |
| 283 | SAP18  | TRCN0000021663                                                                                           |

|     |       |                                                                                                                                                                                                    |
|-----|-------|----------------------------------------------------------------------------------------------------------------------------------------------------------------------------------------------------|
|     |       | TRCN0000021659<br>TRCN0000021660<br>TRCN0000021661<br>TRCN0000021662                                                                                                                               |
| 284 | SATB1 | TRCN0000017173<br>TRCN0000017174<br>TRCN0000017175<br>TRCN0000017176<br>TRCN0000017177                                                                                                             |
| 285 | SATB2 | TRCN0000020688<br>TRCN0000020687<br>TRCN0000020684<br>TRCN0000020686<br>TRCN0000020685<br>TRCN0000140719                                                                                           |
| 286 | SCML2 | TRCN0000019397<br>TRCN0000019395<br>TRCN0000019396<br>TRCN0000019394                                                                                                                               |
| 287 | SETD2 | TRCN0000003029<br>TRCN0000003030<br>TRCN0000003031<br>TRCN0000003032<br>TRCN0000003033                                                                                                             |
| 288 | SETD3 | TRCN0000139106<br>TRCN0000121628<br>TRCN0000122097<br>TRCN0000143148<br>TRCN0000143640<br>TRCN0000175757<br>TRCN0000134840<br>TRCN0000137191<br>TRCN0000134946<br>TRCN0000137911<br>TRCN0000137161 |
| 289 | SETD5 | TRCN0000098703<br>TRCN0000098704                                                                                                                                                                   |
| 290 | SETD7 | TRCN0000078628<br>TRCN0000078629<br>TRCN0000078630<br>TRCN0000078631<br>TRCN0000078632                                                                                                             |
| 291 | SETD8 | TRCN0000130139<br>TRCN0000130036                                                                                                                                                                   |

|     |        |                                                                                        |
|-----|--------|----------------------------------------------------------------------------------------|
|     |        | TRCN0000148268<br>TRCN0000128082                                                       |
| 292 | SFMBT1 | TRCN0000146760<br>TRCN0000146761<br>TRCN0000147760<br>TRCN0000148746<br>TRCN0000147815 |
| 293 | SFMBT2 | TRCN0000148663<br>TRCN0000149533<br>TRCN0000149620<br>TRCN0000149672<br>TRCN0000146511 |
| 294 | SIN3A  | TRCN0000021774<br>TRCN0000021775<br>TRCN0000021776<br>TRCN0000021777<br>TRCN0000021778 |
| 295 | SIN3B  | TRCN0000107807<br>TRCN0000107805<br>TRCN0000107809<br>TRCN0000107808<br>TRCN0000107806 |
| 296 | SIRT1  | TRCN0000018979<br>TRCN0000018980<br>TRCN0000018981<br>TRCN0000018982<br>TRCN0000018983 |
| 297 | SIRT2  | TRCN0000040218<br>TRCN0000040219<br>TRCN0000040220<br>TRCN0000040221<br>TRCN0000040222 |
| 298 | SIRT3  | TRCN0000038890<br>TRCN0000038891<br>TRCN0000038892<br>TRCN0000038893                   |
| 299 | SIRT4  | TRCN0000018944<br>TRCN0000018945<br>TRCN0000018946<br>TRCN0000018947<br>TRCN0000018948 |
| 300 | SIRT5  | TRCN0000018543<br>TRCN0000018544<br>TRCN0000018545                                     |

|     |          |                                                                                        |
|-----|----------|----------------------------------------------------------------------------------------|
|     |          | TRCN0000018546<br>TRCN0000018547                                                       |
| 301 | SIRT6    | TRCN0000050473<br>TRCN0000050474<br>TRCN0000050475<br>TRCN0000050476<br>TRCN0000050477 |
| 302 | SIRT7    | TRCN0000020254<br>TRCN0000020255<br>TRCN0000020256<br>TRCN0000020257<br>TRCN0000020258 |
| 303 | SMARCA1  | TRCN0000050623<br>TRCN0000050624<br>TRCN0000050625<br>TRCN0000050626<br>TRCN0000050627 |
| 304 | SMARCA2  | TRCN0000020329<br>TRCN0000020330<br>TRCN0000020331<br>TRCN0000020332<br>TRCN0000020333 |
| 305 | SMARCA4  | TRCN0000015548<br>TRCN0000015549<br>TRCN0000015550<br>TRCN0000015551<br>TRCN0000015552 |
| 306 | SMARCA5  | TRCN0000013213<br>TRCN0000013214<br>TRCN0000013215<br>TRCN0000013216<br>TRCN0000013217 |
| 307 | SMARCAD1 | TRCN0000050048<br>TRCN0000050051<br>TRCN0000050052<br>TRCN0000050049                   |
| 308 | SMARCAL1 | TRCN0000083572<br>TRCN0000083568<br>TRCN0000083569<br>TRCN0000083570<br>TRCN0000083571 |
| 309 | SMARCB1  | TRCN0000010503<br>TRCN0000039583<br>TRCN0000039584                                     |

|     |         |                                                                                                                |
|-----|---------|----------------------------------------------------------------------------------------------------------------|
|     |         | TRCN0000010504<br>TRCN0000039587<br>TRCN0000039585<br>TRCN0000010502<br>TRCN0000039586                         |
| 310 | SMARCC1 | TRCN0000015628<br>TRCN0000015631<br>TRCN0000015629<br>TRCN0000015630<br>TRCN0000015632                         |
| 311 | SMARCC2 | TRCN0000015698<br>TRCN0000015699<br>TRCN0000015701<br>TRCN0000015702                                           |
| 312 | SMARCD1 | TRCN00000151662<br>TRCN00000157022<br>TRCN00000153623<br>TRCN00000158153<br>TRCN00000157443<br>TRCN00000092957 |
| 313 | SMARCD2 | TRCN0000021267<br>TRCN0000021266<br>TRCN0000021265<br>TRCN0000021264<br>TRCN0000021268                         |
| 314 | SMARCE1 | TRCN0000015778<br>TRCN0000015779<br>TRCN0000015780<br>TRCN0000015781<br>TRCN0000015782                         |
| 315 | SMYD1   | TRCN00000129092<br>TRCN00000130477<br>TRCN00000130695<br>TRCN00000127839<br>TRCN00000128991                    |
| 316 | SMYD2   | TRCN00000128189<br>TRCN00000130403<br>TRCN00000128349<br>TRCN00000130774                                       |
| 317 | SMYD3   | TRCN00000123289<br>TRCN00000123292<br>TRCN00000123293<br>TRCN00000123290<br>TRCN00000123291                    |

|     |          |                                                                                                          |
|-----|----------|----------------------------------------------------------------------------------------------------------|
| 318 | SRCAP    | TRCN0000021354<br>TRCN0000021355<br>TRCN0000021356<br>TRCN0000021357<br>TRCN0000021358                   |
| 319 | SSRP1    | TRCN0000019269<br>TRCN0000019270<br>TRCN0000019271<br>TRCN0000019272<br>TRCN0000019273                   |
| 320 | SUDS3    | TRCN0000038912<br>TRCN0000038909<br>TRCN0000038910<br>TRCN0000038911<br>TRCN0000038913<br>TRCN0000039314 |
| 321 | SUPT16H  | TRCN0000001257<br>TRCN0000001258<br>TRCN0000001259<br>TRCN0000001260<br>TRCN0000001261                   |
| 322 | SUV39H1  | TRCN0000158337<br>TRCN0000150622<br>TRCN0000158270<br>TRCN0000157251<br>TRCN0000157285                   |
| 323 | SUV39H2  | TRCN0000006935<br>TRCN0000006936<br>TRCN0000006937<br>TRCN0000011057<br>TRCN0000006938                   |
| 324 | Suv420h1 | TRCN0000130417<br>TRCN0000129968<br>TRCN0000130307<br>TRCN0000128012<br>TRCN0000130388<br>TRCN0000039198 |
| 325 | Suv420h2 | TRCN0000141493<br>TRCN0000141926<br>TRCN0000143766<br>TRCN0000142036<br>TRCN0000141258<br>TRCN0000039200 |
| 326 | SUZ12    | TRCN0000038724                                                                                           |

|     |               |                                                                                        |
|-----|---------------|----------------------------------------------------------------------------------------|
|     |               | TRCN0000038725<br>TRCN0000038726<br>TRCN0000038727<br>TRCN0000038728                   |
| 327 | TADA2L/TADA2A | TRCN0000017299<br>TRCN0000017298<br>TRCN0000017302<br>TRCN0000017301<br>TRCN0000017300 |
| 328 | TADA3/TADA3L  | TRCN0000015737<br>TRCN0000015733<br>TRCN0000015736<br>TRCN0000015734<br>TRCN0000015735 |
| 329 | TAF1          | TRCN0000006284<br>TRCN0000006285<br>TRCN0000006286<br>TRCN0000006287<br>TRCN0000006288 |
| 330 | TAF3          | TRCN0000016608<br>TRCN0000016609<br>TRCN0000016610<br>TRCN0000016611<br>TRCN0000016612 |
| 331 | TBL1X         | TRCN0000118647<br>TRCN0000118648<br>TRCN0000118649<br>TRCN0000118650<br>TRCN0000118651 |
| 332 | TDRD3         | TRCN0000073294<br>TRCN0000073293<br>TRCN0000073295<br>TRCN0000073296<br>TRCN0000073297 |
| 333 | TET1          | TRCN0000075027<br>TRCN0000075025<br>TRCN0000075024<br>TRCN0000075026<br>TRCN0000075023 |
| 334 | TET2          | TRCN0000122172<br>TRCN0000139778<br>TRCN0000142853<br>TRCN0000144344<br>TRCN0000145351 |

|     |          |                                                                                                          |
|-----|----------|----------------------------------------------------------------------------------------------------------|
| 335 | TLK1     | TRCN0000007056<br>TRCN0000007057<br>TRCN0000007058<br>TRCN0000007059<br>TRCN0000007060                   |
| 336 | TLK2     | TRCN0000002361<br>TRCN0000002362<br>TRCN0000002363<br>TRCN0000002364<br>TRCN0000002365                   |
| 337 | TRIM24   | TRCN0000021260<br>TRCN0000021259<br>TRCN0000021262<br>TRCN0000021263<br>TRCN0000021261<br>TRCN0000088522 |
| 338 | TRIM28   | TRCN0000017999<br>TRCN0000018002<br>TRCN0000018000<br>TRCN0000018001<br>TRCN0000017998                   |
| 339 | TRIM33   | TRCN0000022008<br>TRCN0000022004<br>TRCN0000022005<br>TRCN0000022006<br>TRCN0000022007<br>TRCN0000007228 |
| 340 | TRP53BP1 | TRCN0000081779                                                                                           |
| 341 | TRRAP    | TRCN0000005363<br>TRCN0000005361<br>TRCN0000005362<br>TRCN0000005364<br>TRCN0000005365                   |
| 342 | UBE2A    | TRCN0000010842<br>TRCN0000004005<br>TRCN0000004006<br>TRCN0000004007<br>TRCN0000004008                   |
| 343 | UBE2B    | TRCN0000004009<br>TRCN0000004010<br>TRCN0000004011<br>TRCN0000004012<br>TRCN0000004013                   |
| 344 | UBE2E1   | TRCN0000004014                                                                                           |



|     |          |                                                                                                                            |
|-----|----------|----------------------------------------------------------------------------------------------------------------------------|
|     |          | TRCN0000004015<br>TRCN0000004016<br>TRCN0000004017<br>TRCN0000004018                                                       |
| 345 | UBE2I    | TRCN0000011077<br>TRCN0000007205<br>TRCN0000007206<br>TRCN0000011078<br>TRCN0000007207<br>TRCN0000011078<br>TRCN0000011077 |
| 346 | UHRF1    | TRCN0000004353<br>TRCN0000004352<br>TRCN0000004356<br>TRCN0000004354<br>TRCN0000004355<br>TRCN0000112188                   |
| 347 | UHRF1BP1 | TRCN0000064774<br>TRCN0000064777<br>TRCN0000064776<br>TRCN0000064773<br>TRCN0000064775<br>TRCN0000073848                   |
| 348 | UHRF2    | TRCN0000003479<br>TRCN0000003481<br>TRCN0000003480<br>TRCN0000003482<br>TRCN0000010793<br>TRCN0000040626                   |
| 349 | USP22    | TRCN0000046924<br>TRCN0000046925<br>TRCN0000046926<br>TRCN0000046927                                                       |
| 350 | USP51    | TRCN0000038849<br>TRCN0000038850<br>TRCN0000038851<br>TRCN0000038852<br>TRCN0000038853                                     |
| 351 | UTX      | TRCN0000107760<br>TRCN0000107761<br>TRCN0000107762<br>TRCN0000107763<br>TRCN0000107764                                     |
| 352 | WDR5     | TRCN0000118047                                                                                                             |

|     |         |                                                                                        |
|-----|---------|----------------------------------------------------------------------------------------|
|     |         | TRCN0000118048<br>TRCN0000118049<br>TRCN0000118050<br>TRCN0000118051                   |
| 353 | WDR54   | TRCN0000072663<br>TRCN0000072664<br>TRCN0000072665<br>TRCN0000072666<br>TRCN0000072667 |
| 354 | WDR82   | TRCN0000130689<br>TRCN0000129877<br>TRCN0000128304<br>TRCN0000127796<br>TRCN0000130791 |
| 355 | WHSC1   | TRCN0000019814<br>TRCN0000019815<br>TRCN0000019816<br>TRCN0000019817<br>TRCN0000019818 |
| 356 | WHSC1L1 | TRCN0000015613<br>TRCN0000015614<br>TRCN0000015615<br>TRCN0000015616<br>TRCN0000015617 |
| 357 | WNT5A   | TRCN0000062713<br>TRCN0000062714<br>TRCN0000062715<br>TRCN0000062716<br>TRCN0000062717 |
| 358 | YEATS4  | TRCN0000013143<br>TRCN0000013144<br>TRCN0000013146<br>TRCN0000013145<br>TRCN0000013147 |
| 359 | ZCWPW1  | TRCN0000139148<br>TRCN0000140908<br>TRCN0000145000<br>TRCN0000139000<br>TRCN0000140405 |
| 360 | ZFPM1   | TRCN0000107406<br>TRCN0000107408<br>TRCN0000107407<br>TRCN0000107405<br>TRCN0000107409 |

|     |         |                                                                                                          |
|-----|---------|----------------------------------------------------------------------------------------------------------|
| 361 | ZMYND11 | TRCN0000021253<br>TRCN0000021251<br>TRCN0000021252<br>TRCN0000021249<br>TRCN0000021250<br>TRCN0000088135 |
| 362 | ZMYND8  | TRCN0000037997<br>TRCN0000037996<br>TRCN0000037998<br>TRCN0000037995<br>TRCN0000037994<br>TRCN0000007228 |
| 363 | ZNFX1   | TRCN0000017371<br>TRCN0000017369<br>TRCN0000017372<br>TRCN0000017368<br>TRCN0000017370<br>TRCN0000073848 |
